# Supplementary material for: Deciphering the active species and reaction mechanism in water oxidation catalyzed by a copper complex with redox-active ligands
Source: Royal Society of Chemistry journal article supplement (doi:10.1039/d4qi00163j), 2024-01-01
Supplement: d4qi00163j1.pdf [file d4qi00163j1.pdf]

## Electronic Supplementary Information

### Deciphering the Active Species and Reaction Mechanism in Water Oxidation Catalyzed by the Copper Complex with Redox-Active Ligand

Qing Fan, Cong Yang, Mengdi Li, Chen Wang, Guixia Wang, Xiangfei Kong and  
Qiping Zhu\*

Guangxi Key Laboratory of Electrochemical and Magneto-Chemical Functional  
Materials, College of Chemistry and Bioengineering, Guilin University of  
Technology, Guilin, 541004, China

*\*Author to whom correspondence should be addressed at:  
qipingzhu@glut.edu.cn*

#### Table of Contents

|                                                                                                          |   |
|----------------------------------------------------------------------------------------------------------|---|
| 1. The overall potential energy surface of the water oxidation reaction.....                             | 2 |
| 2. Estimation of activation barriers for single electron transfer by Marcus-Hush theory.                 | 3 |
| 3. The coordination of $\text{HPO}_4^{2-}$ and water for some intermediates. ....                        | 4 |
| 4. The DFT calculated free energy diagram of H-atom abstraction from water.....                          | 5 |
| 5. Gibbs free energy of $\text{Cu}^{\text{II}}\text{-O}^{\bullet\bullet}$ at different functionals. .... | 6 |
| 6. The DFT calculated energies of all optimized structures .....                                         | 7 |
| 7. The cartesian coordinates for all structures .....                                                    | 8 |

# 1. The overall potential energy surface of the water oxidation reaction.

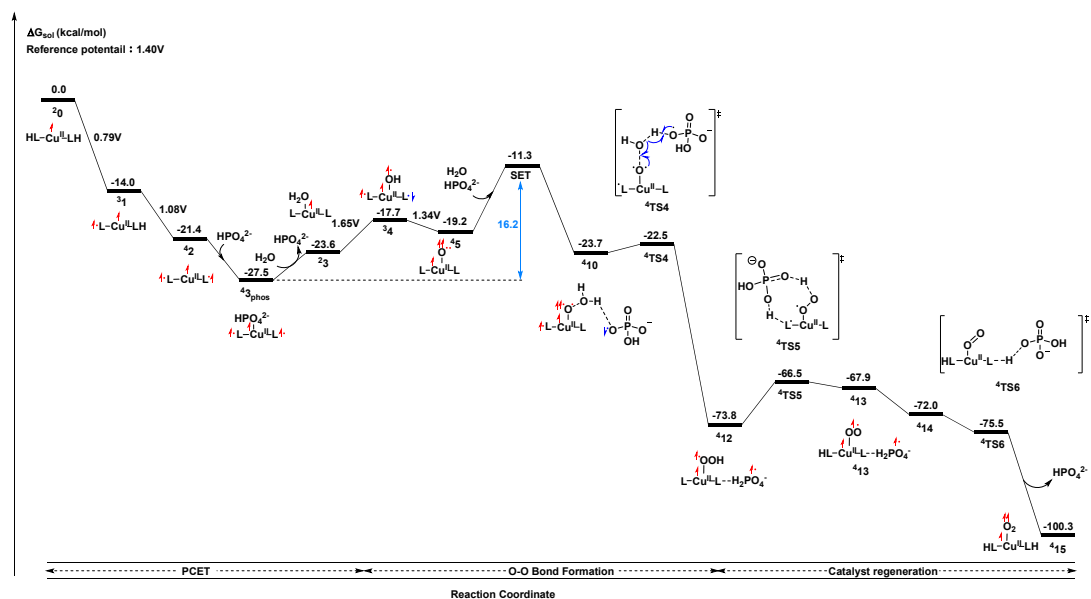

**Fig. S1** The overall potential energy surface of the water oxidation reaction.

The Gibbs free energy diagram for the entire process is depicted along with the intermediate in the catalytic cycle. From the diagrams, it can be observed that the rate-determining step occurs at the SET, with an free energy barrier of 16.2 kcal/mol ( $43_{\text{phos}} \rightarrow \text{SET}$ ).

## 2. Estimation of activation barriers for single electron transfer by Marcus-Hush theory.

The Marcus theory of electron transfer was proposed by Rudolph A. Marcus, building upon the foundation of the Libby electron transfer theory.

(I) Internal reorganization energy ( $\lambda_i$ )

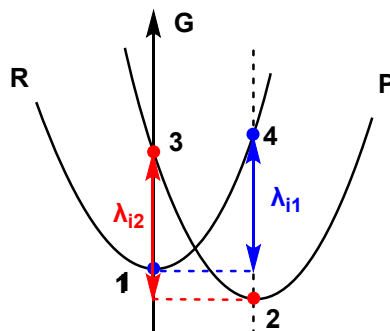

**Fig. S2** Marcus model for single electron transfer reaction:  $R \rightarrow P$

The reaction :  $A + B = C + D \Leftrightarrow A + B = A^+ + B^-$

$$\lambda_{i1} = [E^+(A^+) + E^-(B^-)] - [E(A) + E(B)] = E_4 - E_1$$

$$\lambda_{i2} = [E^+(A) + E^-(B)] - [E(A^+) + E(B^-)] = E_3 - E_2$$

$$\lambda_i = \frac{|\lambda_{i1} - \lambda_{i2}|}{2} \quad (\text{eq.1})$$

(II) External reorganization energy ( $\lambda_o$ )

$$\lambda_o = (332 \text{kcal/mol}) \left( \frac{1}{2a_1} - \frac{1}{2a_2} - \frac{1}{R} \right) \left( \frac{1}{\epsilon_{op}} - \frac{1}{\epsilon} \right) \quad (\text{eq.2})$$

Where  $a_1$  and  $a_2$  are the radii of reactant A and B, respectively,  $R = a_1 + a_2$ ,  $\epsilon_{op}$  and  $\epsilon$  are the optical dielectric constant (1.78) and the static dielectric constant (78.36) of water solvent, respectively.

(III) Activation energy barrier for single-electron transfer ( $\Delta G^{0\ddagger}$ )

The total reorganization energy  $\lambda = \lambda_i + \lambda_o$ ,

$$\Delta G^{0\ddagger} = (\Delta G_r + \lambda)^2 / 4\lambda \quad (\text{eq. 3})$$

Where  $\Delta G_r$  is the Gibbs free energy change during electron gain or loss reactions.

### 3. The coordination of $\text{HPO}_4^{2-}$ and water for some intermediates.

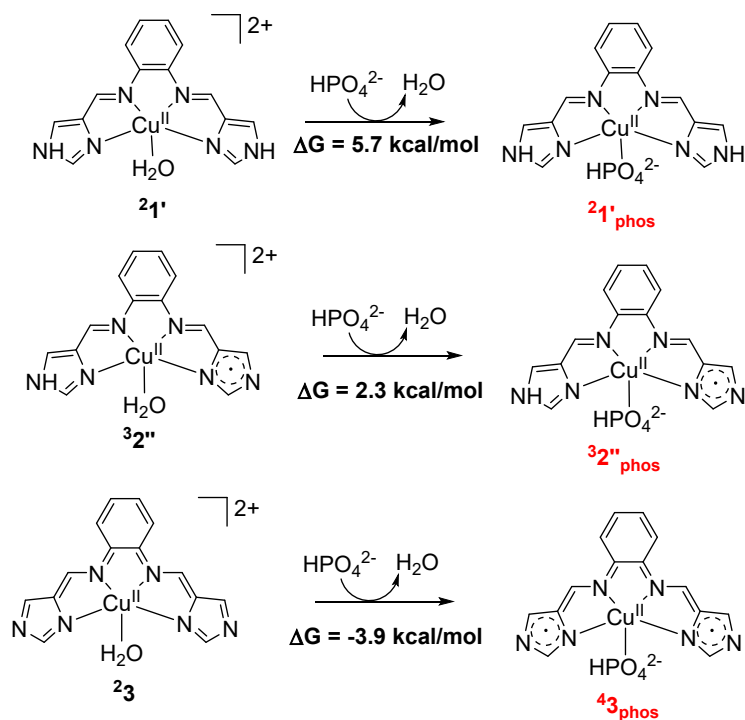

**Fig. S3** The reaction free energy of the ligand exchange reaction

For intermediates  $21'$  and  $32''$ , the coordination of  $\text{HPO}_4^{2-}$  with Cu results in a higher reaction free energy compared to water coordination, as depicted in the Fig. 3. However, for intermediate 3, the coordination with  $\text{HPO}_4^{2-}$  is more stable than with water. Starting from  $43_{\text{phos}}$ , an extra water cannot further coordinate as the Cu center, suggesting the  $43_{\text{phos}}$  is saturated coordination complex. Consequently,  $\text{HPO}_4^{2-}$  dissociates to create a vacancy for water to occupy, thereby facilitating the reaction, leading to the formation of  $23$  coordination.

#### 4. The DFT calculated free energy diagram of H-atom abstraction from water.

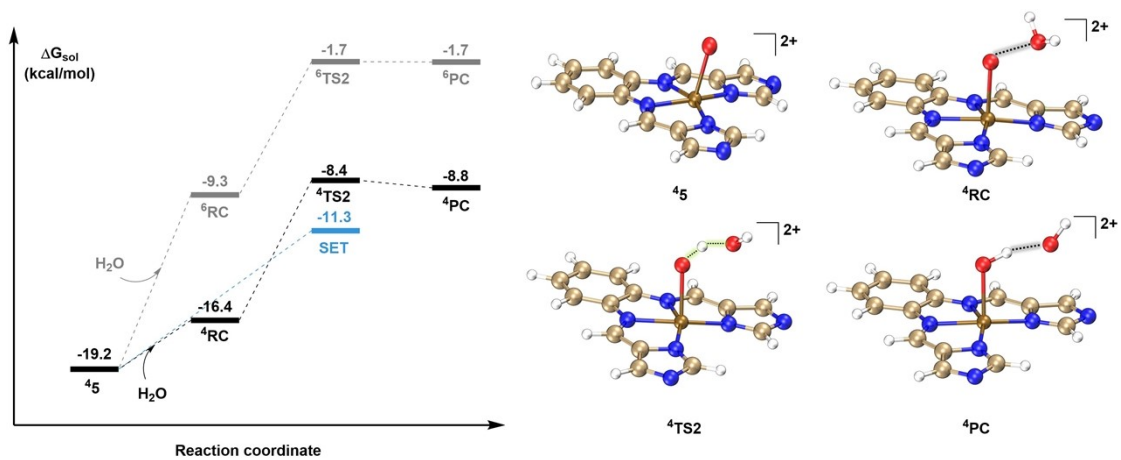

**Fig. S4** The free energy diagram of H-atom abstraction from water.

We have computed the process involving the formation of  $\text{Cu-OH}^*$  and  $\text{OH}^*$  from  $\text{Cu(II)-O}^{**}$  and  $\text{H}_2\text{O}$ , considering both quartet and sextet spin states. The calculations indicate that the reaction pathway for the quadruplet state is lower than that for the sextet state in free energy, ranging from  ${}^4\text{5}$  to  ${}^4\text{TS2}$ , with an activation energy of 10.8 kcal/mol higher than the SET energy by 2.9 kcal/mol. Therefore, this pathway does not hold an advantage.

## 5. Gibbs free energy of Cu<sup>II</sup>-O<sup>••</sup> at different functionals.

Table S1 Gibbs free energy of Cu<sup>II</sup>-O<sup>••</sup> at different functionals (kcal/mol)

|         | B3LYP*-D3 | M06L | M06 | PBE0-D3 | TPSSh |
|---------|-----------|------|-----|---------|-------|
| Doublet | 1.1       | 3.7  | 2.7 | 3.2     | 2.4   |
| Quartet | 0         | 0    | 0   | 0       | 0     |
| Sextet  | 6.8       | 6.3  | 1.7 | 5.5     | 6.3   |

For the Cu<sup>II</sup>-O<sup>••</sup> intermediate <sup>4</sup>5, we considered the doublet state, quartet and sextet states, and performed calculations using five different functionals: B3LYP\*-D3, M06L, M06, PBE0-D3, and TPSSh. The results indicate that the quartet state is the most stable, and spin density analysis also suggests that the oxygen atom of Cu<sup>II</sup>-oxyl complex is in a biradical state (Cu<sup>II</sup>-O<sup>••</sup>).

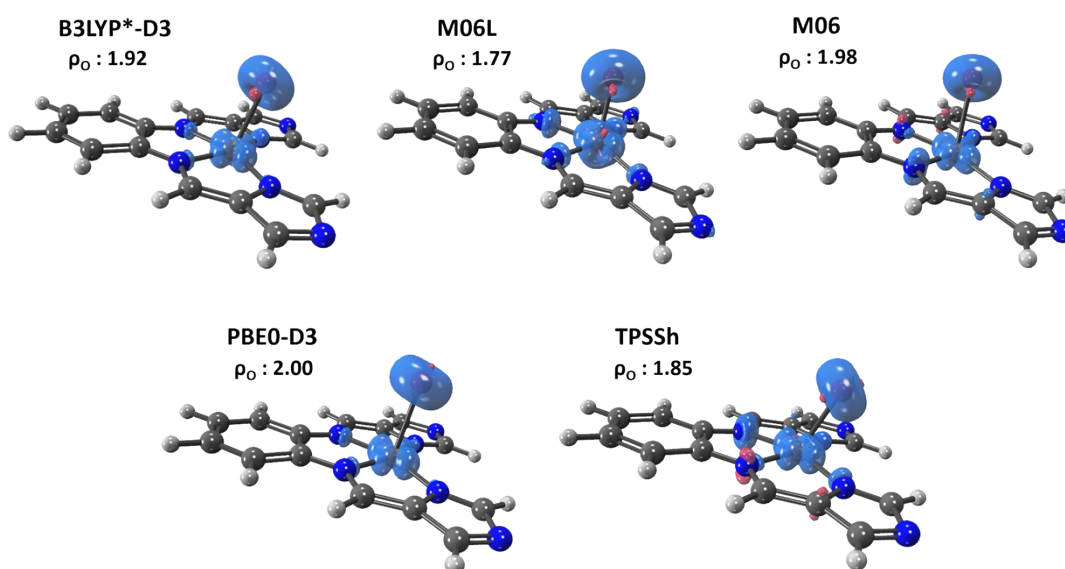

## 6. The DFT calculated energies of all optimized structures

**Table S2.** The DFT calculated energies of all optimized structures

| Species                                     | G <sub>C</sub><br>hartree | G(gas)<br>hartree | E <sub>SP</sub> + G <sub>SOL</sub><br>hartree | G<br>hartree | Final G (1.9)<br>hartree |
|---------------------------------------------|---------------------------|-------------------|-----------------------------------------------|--------------|--------------------------|
| H <sub>2</sub> O                            | 0.003564                  | -76.354759        | -76.03024812                                  | -76.0266841  | -76.0198316 (4.3)        |
| O <sub>2</sub>                              | -0.016089                 | -150.220889       | -149.575865                                   | -149.591954  | -149.5889261             |
| HPO <sub>4</sub> <sup>2-</sup>              | -0.002999                 | -642.487273       | -640.636351                                   | -640.63935   | -640.6363224             |
| H <sub>2</sub> PO <sub>4</sub> <sup>-</sup> | 0.008233                  | -643.258643       | -641.105459                                   | -641.097226  | -641.0941983             |
| <b>Cu</b>                                   |                           |                   |                                               |              |                          |
| <sup>20</sup>                               | 0.208346                  | -2508.305846      | -2500.878357                                  | -2500.67001  | -2500.66698              |
| <sup>31</sup>                               | 0.193525                  | -2507.634628      | -2500.231102                                  | -2500.03758  | -2500.03455              |
| <sup>42</sup>                               | 0.177812                  | -2506.950802      | -2499.5724                                    | -2499.39459  | -2499.39156              |
| <sup>43</sup> <sub>phos</sub>               | 0.197031                  | -3150.124071      | -3140.237776                                  | -3140.040745 | -3140.037717             |
| <sup>23</sup>                               | 0.200318                  | -2583.336556      | -2575.618311                                  | -2575.41799  | -2575.41497              |
| <sup>34</sup>                               | 0.185989                  | -2582.647884      | -2574.939912                                  | -2574.75392  | -2574.75089              |
| <sup>21</sup> '                             | 0.226723                  | -2584.682214      | -2586.422701                                  | -2586.19598  | -2586.19295              |
| <sup>32</sup> '                             | 0.215371                  | -2583.99202       | -2585.726435                                  | -2585.51106  | -2585.50804              |
| <sup>43</sup> '                             | 0.200504                  | -2583.321677      | -2585.056006                                  | -2584.85550  | -2584.85247              |
| <sup>32</sup> ''                            | 0.212621                  | -2584.012019      | -2585.754651                                  | -2585.54203  | -2585.53900              |
| <sup>36</sup>                               | 0.23075                   | -3302.176604      | -3291.646522                                  | -3291.41577  | -3291.41274              |
| <sup>3</sup> TS1                            | 0.229897                  | -3302.162711      | -3291.615907                                  | -3291.38601  | -3291.38298              |
| <sup>37</sup>                               | 0.202157                  | -2658.788528      | -2650.56347                                   | -2650.36131  | -2650.35828              |
| <sup>45</sup>                               | 0.176605                  | -2581.975607      | -2574.27811                                   | -2574.1015   | -2574.09848              |
| <sup>48</sup>                               | 0.196231                  | -2658.349889      | -2650.313115                                  | -2650.116884 | -2650.113856             |
| <sup>4</sup> TS2                            | 0.191303                  | -2658.328521      | -2650.295476                                  | -2650.104173 | -2650.101145             |
| <sup>49</sup>                               | 0.218886                  | -3301.50391       | -3290.98365                                   | -3290.76476  | -3290.76173              |
| <sup>4</sup> TS3                            | 0.216838                  | -3301.48907       | -3290.97981                                   | -3290.76297  | -3290.75995              |
| <sup>410</sup>                              | 0.18913                   | -2658.15983       | -2649.93657                                   | -2649.74744  | -2649.74441              |
| <sup>411</sup>                              | 0.222474                  | -3301.58898       | -3291.06706                                   | -3290.84459  | -3290.84156              |
| <sup>4</sup> TS4                            | 0.218887                  | -3301.58656       | -3291.05193                                   | -3290.83304  | -3290.83001              |
| <sup>412</sup>                              | 0.223503                  | -3301.58983       | -3291.05881                                   | -3290.83530  | -3290.83228              |
| <sup>413</sup>                              | 0.2185                    | -3301.58407       | -3291.06021                                   | -3290.84171  | -3290.83868              |
| <sup>4</sup> TS5                            | 0.213828                  | -3301.58699       | -3291.06115                                   | -3290.84732  | -3290.84429              |
| <sup>414</sup>                              | 0.203936                  | -2658.52437       | -2650.45452                                   | -2650.25059  | -2650.24756              |

- The G<sub>C</sub> designate the thermal correction of Enthalpy and Gibbs Free Energy at B3LYP-D3/def2-SVP level.
- The G(gas) designate Enthalpy and Gibbs Free Energy in the gas phase at the B3LYP-D3/def2-SVP level.
- The E<sub>SP</sub> + G<sub>SOL</sub> designates the sum of single point energy at B3LYP-D3/def2-TZVP level and the solvation free energy calculated by SMD continuum solvent mode.

## 7. The cartesian coordinates for all structures

H<sub>2</sub>O

| Center Number | Atomic Number | Atomic Type | Coordinates(Angstroms) |             |             |
|---------------|---------------|-------------|------------------------|-------------|-------------|
|               |               |             | X                      | Y           | Z           |
| 1             | 8             | O           | 0.00000000             | 0.00000000  | 0.12022500  |
| 2             | 1             | H           | 0.00000000             | -0.75711800 | -0.48089800 |
| 3             | 1             | H           | 0.00000000             | 0.75711800  | -0.48089800 |

O<sub>2</sub>

| Center Number | Atomic Number | Atomic Type | Coordinates(Angstroms) |            |             |
|---------------|---------------|-------------|------------------------|------------|-------------|
|               |               |             | X                      | Y          | Z           |
| 1             | 8             | O           | 0.00000000             | 0.00000000 | 0.59997900  |
| 2             | 8             | O           | 0.00000000             | 0.00000000 | -0.59997900 |

HPO<sub>4</sub><sup>2-</sup>

| Center Number | Atomic Number | Atomic Type | Coordinates(Angstroms) |             |             |
|---------------|---------------|-------------|------------------------|-------------|-------------|
|               |               |             | X                      | Y           | Z           |
| 1             | 15            | P           | -0.16277300            | 0.00039400  | -0.07219300 |
| 2             | 8             | O           | -0.90876200            | 1.30005000  | 0.29495600  |
| 3             | 8             | O           | 1.28983200             | -0.00976800 | 0.98879300  |
| 4             | 1             | H           | 1.89774300             | 0.00046400  | 0.23513500  |
| 5             | 8             | O           | -0.90166700            | -1.31115800 | 0.26299600  |
| 6             | 8             | O           | 0.58857900             | 0.02007900  | -1.44077500 |

H<sub>2</sub>PO<sub>4</sub><sup>-</sup>

| Center Number | Atomic Number | Atomic Type | Coordinates(Angstroms) |             |             |
|---------------|---------------|-------------|------------------------|-------------|-------------|
|               |               |             | X                      | Y           | Z           |
| 1             | 15            | P           | 0.00000000             | 0.11865700  | 0.13551100  |
| 2             | 8             | O           | -0.00038600            | 1.61173500  | 0.23925800  |
| 3             | 8             | O           | -1.29908100            | -0.33864400 | -0.83656000 |
| 4             | 1             | H           | -1.57328000            | -1.18170900 | -0.45182000 |
| 5             | 8             | O           | 1.29871600             | -0.33789500 | -0.83727900 |

|   |   |   |            |             |             |
|---|---|---|------------|-------------|-------------|
| 6 | 8 | O | 0.00069800 | -0.86237100 | 1.29355400  |
| 7 | 1 | H | 1.57370600 | -1.18074200 | -0.45263000 |

<sup>20</sup>

| Center Number | Atomic Number | Atomic Type | Coordinates(Angstroms) |             |             |
|---------------|---------------|-------------|------------------------|-------------|-------------|
|               |               |             | X                      | Y           | Z           |
| 1             | 29            | Cu          | -0.60639800            | -0.00000600 | -0.00008200 |
| 2             | 7             | N           | 0.92943700             | 1.30034200  | -0.00025400 |
| 3             | 7             | N           | 0.92930100             | -1.30046300 | -0.00019300 |
| 4             | 6             | C           | 4.61732900             | -0.70249400 | 0.00027800  |
| 5             | 6             | C           | 3.41744600             | -1.41237400 | 0.00013200  |
| 6             | 6             | C           | 2.20324700             | -0.71188900 | -0.00012300 |
| 7             | 6             | C           | 2.20326400             | 0.71170500  | -0.00019100 |
| 8             | 6             | C           | 3.41751800             | 1.41213300  | -0.00007800 |
| 9             | 6             | C           | 4.61736300             | 0.70220600  | 0.00017400  |
| 10            | 1             | H           | 5.56489400             | -1.24539500 | 0.00042400  |
| 11            | 1             | H           | 3.43464300             | -2.50355500 | 0.00011600  |
| 12            | 1             | H           | 3.43474200             | 2.50331500  | -0.00022700 |
| 13            | 1             | H           | 5.56495900             | 1.24505300  | 0.00024700  |
| 14            | 6             | C           | -2.92261800            | -2.19312800 | 0.00021300  |
| 15            | 6             | C           | -0.83217400            | -2.80836400 | -0.00001200 |
| 16            | 6             | C           | -1.58574700            | -3.96563600 | -0.00007200 |
| 17            | 7             | N           | -2.89026400            | -3.54899800 | 0.00006900  |
| 18            | 1             | H           | -3.70698000            | -4.15839400 | 0.00011000  |
| 19            | 1             | H           | -3.84639000            | -1.61683500 | 0.00053500  |
| 20            | 1             | H           | -1.30079900            | -5.01593200 | -0.00020500 |
| 21            | 6             | C           | -1.58539200            | 3.96578300  | 0.00021100  |
| 22            | 6             | C           | -0.83193600            | 2.80844600  | 0.00005200  |
| 23            | 6             | C           | -2.92243400            | 2.19339700  | -0.00006600 |
| 24            | 7             | N           | -2.88995100            | 3.54926100  | 0.00015300  |
| 25            | 1             | H           | -3.70660800            | 4.15873400  | 0.00024300  |
| 26            | 1             | H           | -1.30033800            | 5.01605100  | 0.00039400  |
| 27            | 1             | H           | -3.84624900            | 1.61718700  | -0.00015700 |
| 28            | 6             | C           | 0.58879300             | -2.54784700 | 0.00000200  |
| 29            | 6             | C           | 0.58903200             | 2.54774900  | -0.00005400 |
| 30            | 1             | H           | 1.31113100             | 3.37349500  | -0.00005800 |
| 31            | 1             | H           | 1.31073500             | -3.37372800 | 0.00000200  |
| 32            | 7             | N           | -1.69435600            | -1.71157700 | 0.00012500  |



|    |   |   |             |            |             |
|----|---|---|-------------|------------|-------------|
| 33 | 7 | N | -1.69421500 | 1.71172700 | -0.00016400 |
|----|---|---|-------------|------------|-------------|

31

| Center Number | Atomic Number | Atomic Type | Coordinates(Angstroms) |             |             |
|---------------|---------------|-------------|------------------------|-------------|-------------|
|               |               |             | X                      | Y           | Z           |
| 1             | 29            | Cu          | -0.62329900            | 0.12348100  | -0.00000200 |
| 2             | 7             | N           | 1.12473200             | 1.14053300  | 0.00000300  |
| 3             | 7             | N           | 0.68485400             | -1.41350500 | 0.00000100  |
| 4             | 6             | C           | 4.41898500             | -1.39898500 | 0.00001100  |
| 5             | 6             | C           | 3.12056500             | -1.92027800 | 0.00000700  |
| 6             | 6             | C           | 2.03196300             | -1.04700000 | 0.00000500  |
| 7             | 6             | C           | 2.25921500             | 0.38296500  | 0.00000600  |
| 8             | 6             | C           | 3.58673000             | 0.88431400  | 0.00000900  |
| 9             | 6             | C           | 4.64881700             | -0.00299400 | 0.00001200  |
| 10            | 1             | H           | 5.27071200             | -2.08358700 | 0.00001300  |
| 11            | 1             | H           | 2.97577000             | -3.00191600 | 0.00000600  |
| 12            | 1             | H           | 3.77236800             | 1.95950000  | 0.00001000  |
| 13            | 1             | H           | 5.67377900             | 0.37434900  | 0.00001400  |
| 14            | 6             | C           | -3.25814200            | -1.67034100 | -0.00000900 |
| 15            | 6             | C           | -1.29565700            | -2.61647100 | -0.00000400 |
| 16            | 6             | C           | -2.22987000            | -3.63896500 | -0.00000700 |
| 17            | 7             | N           | -3.44525900            | -3.01743500 | -0.00001000 |
| 18            | 1             | H           | -4.35135900            | -3.48578600 | -0.00001200 |
| 19            | 1             | H           | -4.07741600            | -0.95217400 | -0.00001000 |
| 20            | 1             | H           | -2.11844300            | -4.72205000 | -0.00000700 |
| 21            | 6             | C           | -0.99247200            | 4.21283300  | -0.00000100 |
| 22            | 6             | C           | -0.35134100            | 2.90725400  | 0.00000000  |
| 23            | 6             | C           | -2.49516300            | 2.68917500  | -0.00000600 |
| 24            | 7             | N           | -2.29265800            | 4.05124700  | -0.00000500 |
| 25            | 1             | H           | -0.50852800            | 5.19278200  | 0.00000000  |
| 26            | 1             | H           | -3.49776500            | 2.25654000  | -0.00000800 |
| 27            | 6             | C           | 0.14307300             | -2.59342000 | 0.00000000  |
| 28            | 6             | C           | 0.97487500             | 2.46540500  | 0.00000300  |
| 29            | 1             | H           | 1.81808300             | 3.16481200  | 0.00000600  |
| 30            | 1             | H           | 0.71899700             | -3.52743400 | 0.00000100  |
| 31            | 7             | N           | -1.97045000            | -1.39404800 | -0.00000500 |
| 32            | 7             | N           | -1.38264700            | 1.96507600  | -0.00000300 |

42

| Center Number | Atomic Number | Atomic Type | Coordinates(Angstroms) |             |             |
|---------------|---------------|-------------|------------------------|-------------|-------------|
|               |               |             | X                      | Y           | Z           |
| 1             | 29            | Cu          | 0.65938900             | 0.00002100  | -0.00029200 |
| 2             | 7             | N           | -0.89833100            | 1.29852600  | 0.00040900  |
| 3             | 7             | N           | -0.89826600            | -1.29857300 | -0.00028800 |
| 4             | 6             | C           | -4.57865100            | -0.70234800 | 0.00013700  |
| 5             | 6             | C           | -3.37400300            | -1.41786000 | -0.00016000 |
| 6             | 6             | C           | -2.15275200            | -0.72290400 | -0.00002700 |
| 7             | 6             | C           | -2.15278800            | 0.72279700  | 0.00037200  |
| 8             | 6             | C           | -3.37407200            | 1.41769100  | 0.00067100  |
| 9             | 6             | C           | -4.57868700            | 0.70211700  | 0.00055900  |
| 10            | 1             | H           | -5.52686300            | -1.24532100 | 0.00004300  |
| 11            | 1             | H           | -3.39662600            | -2.50921900 | -0.00049800 |
| 12            | 1             | H           | -3.39675300            | 2.50904800  | 0.00098600  |
| 13            | 1             | H           | -5.52692400            | 1.24504500  | 0.00078900  |
| 14            | 6             | C           | 2.93309900             | -2.23954900 | -0.00011600 |
| 15            | 6             | C           | 0.85361600             | -2.79294200 | -0.00061400 |
| 16            | 6             | C           | 1.70095900             | -3.98782400 | 0.00009600  |
| 17            | 7             | N           | 2.95427300             | -3.61713400 | 0.00030800  |
| 18            | 1             | H           | 3.85007100             | -1.64563800 | -0.00006300 |
| 19            | 1             | H           | 1.37961900             | -5.03294800 | 0.00029700  |
| 20            | 6             | C           | 1.70069400             | 3.98791900  | 0.00020500  |
| 21            | 6             | C           | 0.85346900             | 2.79298400  | 0.00007600  |
| 22            | 6             | C           | 2.93298300             | 2.23968400  | -0.00005300 |
| 23            | 7             | N           | 2.95408700             | 3.61727200  | 0.00027700  |
| 24            | 1             | H           | 1.37929500             | 5.03302500  | 0.00055600  |
| 25            | 1             | H           | 3.84999300             | 1.64582400  | -0.00071300 |
| 26            | 6             | C           | -0.54267300            | -2.57012800 | -0.00045100 |
| 27            | 6             | C           | -0.54280300            | 2.57009800  | 0.00047500  |
| 28            | 1             | H           | -1.25721900            | 3.40151700  | 0.00065900  |
| 29            | 1             | H           | -1.25704600            | -3.40158000 | -0.00034800 |
| 30            | 7             | N           | 1.70915000             | -1.70520900 | -0.00086300 |
| 31            | 7             | N           | 1.70906200             | 1.70529500  | 0.00012100  |

43<sub>phos</sub>

| Center Number | Atomic Number | Atomic Type | Coordinates(Angstroms) |             |             |
|---------------|---------------|-------------|------------------------|-------------|-------------|
|               |               |             | X                      | Y           | Z           |
| 1             | 29            | Cu          | 0.00193400             | 0.21636200  | -0.49735200 |
| 2             | 7             | N           | 1.21846200             | -1.40928200 | -0.40404100 |
| 3             | 7             | N           | 1.81879700             | 1.09625500  | -0.24986900 |
| 4             | 6             | C           | 5.07446800             | -0.34984600 | 0.78017500  |
| 5             | 6             | C           | 4.14189100             | 0.62380400  | 0.47174700  |
| 6             | 6             | C           | 2.83514800             | 0.25071700  | 0.07391200  |
| 7             | 6             | C           | 2.49386600             | -1.15809200 | -0.00190300 |
| 8             | 6             | C           | 3.47467100             | -2.12709100 | 0.32361400  |
| 9             | 6             | C           | 4.74100900             | -1.72618800 | -0.70665400 |
| 10            | 1             | H           | 6.08037900             | -0.05727500 | 1.08983200  |
| 11            | 1             | H           | 4.40790600             | 1.67987500  | 0.54085000  |
| 12            | 1             | H           | 3.22638400             | -3.18854000 | 0.27406600  |
| 13            | 1             | H           | 5.49402600             | -2.47571900 | 0.96016000  |
| 14            | 6             | C           | -1.60781200            | 2.91888400  | -0.86529700 |
| 15            | 6             | C           | 0.52717500             | 2.98060000  | -0.57864200 |
| 16            | 6             | C           | -0.00680200            | 4.31404900  | -0.59551500 |
| 17            | 7             | N           | -1.31427600            | 4.26342200  | -0.77306200 |
| 18            | 1             | H           | -2.62267300            | 2.52810100  | -0.94232300 |
| 19            | 1             | H           | 0.53964400             | 5.25144900  | -0.47157500 |
| 20            | 6             | C           | -1.79526100            | -3.40551400 | -1.26872000 |
| 21            | 6             | C           | -0.73682200            | -2.45609400 | -1.03919900 |
| 22            | 6             | C           | -2.53837700            | -1.43084100 | -1.59626100 |
| 23            | 7             | N           | -2.89340100            | -2.76428200 | -1.61380600 |
| 24            | 1             | H           | -1.74431300            | -4.49226800 | -1.17466400 |
| 25            | 1             | H           | -3.25250000            | -0.62994900 | -1.78493300 |
| 26            | 6             | C           | 1.77698200             | 2.42084300  | -0.29193100 |
| 27            | 6             | C           | 0.58415900             | -2.55726200 | -0.58984400 |
| 28            | 1             | H           | 1.04704400             | -3.53370200 | -0.40057100 |
| 29            | 1             | H           | 2.65209700             | 3.05235000  | -0.09279200 |
| 30            | 7             | N           | -0.55355500            | 2.12845900  | -0.78601000 |
| 31            | 7             | N           | -1.27466500            | -1.20120100 | -1.28461800 |
| 32            | 15            | P           | -2.19453000            | -0.10826100 | 1.64226600  |
| 33            | 8             | O           | -2.80494300            | 0.47808600  | 2.94442300  |
| 34            | 8             | O           | -2.44226600            | -1.73550400 | 1.61089400  |
| 35            | 1             | H           | -3.38908300            | -1.92274200 | 1.68652500  |
| 36            | 8             | O           | -3.11385400            | 0.54271000  | 0.57861200  |
| 37            | 8             | O           | -0.68548300            | 0.03426200  | 1.45503800  |

23

| Center Number | Atomic Number | Atomic Type | Coordinates(Angstroms) |             |             |
|---------------|---------------|-------------|------------------------|-------------|-------------|
|               |               |             | X                      | Y           | Z           |
| 1             | 29            | Cu          | -0.64216100            | 0.00000000  | 0.09785900  |
| 2             | 7             | N           | 0.93767100             | -1.28987800 | -0.10310100 |
| 3             | 7             | N           | 0.93767100             | 1.28987800  | -0.10310100 |
| 4             | 6             | C           | 4.56104200             | 0.72458400  | -0.13950600 |
| 5             | 6             | C           | 3.39856900             | 1.44570600  | -0.11982700 |
| 6             | 6             | C           | 2.14725900             | 0.75101400  | -0.09634200 |
| 7             | 6             | C           | 2.14725900             | -0.75101400 | -0.09634200 |
| 8             | 6             | C           | 3.39856900             | -1.44570600 | -0.11982700 |
| 9             | 6             | C           | 4.56104200             | -0.72458400 | -0.13950600 |
| 10            | 1             | H           | 5.52258300             | 1.24445600  | -0.15312400 |
| 11            | 1             | H           | 3.42386700             | 2.53620200  | -0.11555900 |
| 12            | 1             | H           | 3.42386700             | -2.53620200 | -0.11555900 |
| 13            | 1             | H           | 5.52258300             | -1.24445600 | -0.15312400 |
| 14            | 6             | C           | -2.87423000            | 2.26498100  | -0.21683500 |
| 15            | 6             | C           | -0.78939100            | 2.80995900  | -0.22520100 |
| 16            | 6             | C           | -1.62547900            | 4.00254100  | -0.35739600 |
| 17            | 7             | N           | -2.87986100            | 3.64781500  | -0.35142500 |
| 18            | 1             | H           | -3.80396300            | 1.69225400  | -0.18228200 |
| 19            | 1             | H           | -1.29231600            | 5.03933200  | -0.45387700 |
| 20            | 6             | C           | -1.62547900            | -4.00254200 | -0.35739600 |
| 21            | 6             | C           | -0.78939100            | -2.80995900 | -0.22520100 |
| 22            | 6             | C           | -2.87423000            | -2.26498100 | -0.21683500 |
| 23            | 7             | N           | -2.87986000            | -3.64781500 | -0.35142500 |
| 24            | 1             | H           | -1.29231600            | -5.03933200 | -0.45387700 |
| 25            | 1             | H           | -3.80396300            | -1.69225400 | -0.18228200 |
| 26            | 6             | C           | 0.56921200             | 2.59390200  | -0.20257200 |
| 27            | 6             | C           | 0.56921200             | -2.59390200 | -0.20257200 |
| 28            | 1             | H           | 1.29129700             | -3.41328200 | -0.28264900 |
| 29            | 1             | H           | 1.29129700             | 3.41328200  | -0.28264900 |
| 30            | 7             | N           | -1.67851400            | 1.72117800  | -0.13611500 |
| 31            | 7             | N           | -1.67851400            | -1.72117800 | -0.13611500 |
| 32            | 8             | O           | -0.51420200            | 0.00000000  | 2.30157400  |
| 33            | 1             | H           | -0.75029100            | -0.76852800 | 2.84280100  |
| 34            | 1             | H           | -0.75029100            | 0.76852800  | 2.84280100  |

34

| Center<br>Number | Atomic<br>Number | Atomic<br>Type | Coordinates(Angstroms) |             |             |
|------------------|------------------|----------------|------------------------|-------------|-------------|
|                  |                  |                | X                      | Y           | Z           |
| 1                | 29               | Cu             | 0.62217400             | 0.07565600  | 0.04713000  |
| 2                | 7                | N              | -1.03734200            | 1.25740000  | -0.06105400 |
| 3                | 7                | N              | -0.86641200            | -1.31694000 | -0.10932800 |
| 4                | 6                | C              | -4.52658000            | -0.98997800 | -0.08101000 |
| 5                | 6                | C              | -3.31320600            | -1.63195100 | -0.09207400 |
| 6                | 6                | C              | -2.11587800            | -0.85605300 | -0.08264500 |
| 7                | 6                | C              | -2.21477500            | 0.63493200  | -0.05945000 |
| 8                | 6                | C              | -3.50435100            | 1.24656600  | -0.05249400 |
| 9                | 6                | C              | -4.62216300            | 0.45035400  | -0.06185500 |
| 10               | 1                | H              | -5.44985300            | -1.57522600 | -0.08566100 |
| 11               | 1                | H              | -3.26624600            | -2.72168500 | -0.10529900 |
| 12               | 1                | H              | -3.60117100            | 2.33294900  | -0.03386400 |
| 13               | 1                | H              | -5.61464500            | 0.90843700  | -0.05260100 |
| 14               | 6                | C              | 3.00784700             | -2.05108600 | -0.25772800 |
| 15               | 6                | C              | 0.95686000             | -2.72264300 | -0.21347400 |
| 16               | 6                | C              | 1.86170700             | -3.86215400 | -0.32397500 |
| 17               | 7                | N              | 3.09409100             | -3.42930400 | -0.35342800 |
| 18               | 1                | H              | 3.89997300             | -1.42024600 | -0.25343900 |
| 19               | 1                | H              | 1.59426300             | -4.92054600 | -0.38321200 |
| 20               | 6                | C              | 1.34453200             | 4.13674000  | -0.21661400 |
| 21               | 6                | C              | 0.58802400             | 2.88808400  | -0.13498000 |
| 22               | 6                | C              | 2.70410800             | 2.47969400  | -0.17330400 |
| 23               | 7                | N              | 2.61939400             | 3.86256600  | -0.23986800 |
| 24               | 1                | H              | 0.94525900             | 5.15369000  | -0.25766400 |
| 25               | 1                | H              | 3.66843600             | 1.96611400  | -0.17727300 |
| 26               | 6                | C              | -0.41622300            | -2.59080600 | -0.17411600 |
| 27               | 6                | C              | -0.75751600            | 2.58117200  | -0.10844700 |
| 28               | 1                | H              | -1.53213000            | 3.35457600  | -0.14069300 |
| 29               | 1                | H              | -1.08315100            | -3.45885100 | -0.20636500 |
| 30               | 7                | N              | 1.77708600             | -1.57983200 | -0.17805700 |
| 31               | 7                | N              | 1.54350000             | 1.85704100  | -0.10805200 |
| 32               | 8                | O              | 0.86006800             | -0.53825600 | 2.14659800  |
| 33               | 1                | H              | 1.64914300             | -0.34093800 | 2.69802600  |

21'

| Center<br>Number | Atomic<br>Number | Atomic<br>Type | Coordinates(Angstroms) |             |             |
|------------------|------------------|----------------|------------------------|-------------|-------------|
|                  |                  |                | X                      | Y           | Z           |
| 1                | 29               | Cu             | -0.57536900            | 0.00003500  | 0.14544500  |
| 2                | 7                | N              | 0.96279100             | 1.29904500  | -0.11992300 |
| 3                | 7                | N              | 0.96274000             | -1.29906000 | -0.11989000 |
| 4                | 6                | C              | 4.65155200             | -0.70222800 | -0.09151300 |
| 5                | 6                | C              | 3.45094500             | -1.41138800 | -0.09708100 |
| 6                | 6                | C              | 2.23605200             | -0.71187100 | -0.10560400 |
| 7                | 6                | C              | 2.23607800             | 0.71180900  | -0.10562000 |
| 8                | 6                | C              | 3.45099700             | 1.41128200  | -0.09711000 |
| 9                | 6                | C              | 4.65157700             | 0.70207800  | -0.09152700 |
| 10               | 1                | H              | 5.59895000             | -1.24526700 | -0.08024800 |
| 11               | 1                | H              | 3.46633200             | -2.50271800 | -0.08470300 |
| 12               | 1                | H              | 3.46642000             | 2.50261200  | -0.08475400 |
| 13               | 1                | H              | 5.59899600             | 1.24508300  | -0.08027200 |
| 14               | 6                | C              | -2.88490000            | -2.22345900 | -0.13329900 |
| 15               | 6                | C              | -0.79421400            | -2.80408500 | -0.29065600 |
| 16               | 6                | C              | -1.53693800            | -3.95982000 | -0.44102400 |
| 17               | 7                | N              | -2.84380600            | -3.56605800 | -0.33708000 |
| 18               | 1                | H              | -3.65483000            | -4.17827900 | -0.40558900 |
| 19               | 1                | H              | -3.81248100            | -1.66539300 | -0.01672400 |
| 20               | 1                | H              | -1.24303400            | -4.99387000 | -0.60912600 |
| 21               | 6                | C              | -1.53680100            | 3.95989700  | -0.44096200 |
| 22               | 6                | C              | -0.79411200            | 2.80413300  | -0.29066100 |
| 23               | 6                | C              | -2.88481500            | 2.22357700  | -0.13322800 |
| 24               | 7                | N              | -2.84367900            | 3.56618000  | -0.33697300 |
| 25               | 1                | H              | -3.65468300            | 4.17843300  | -0.40542300 |
| 26               | 1                | H              | -1.24286600            | 4.99394300  | -0.60904000 |
| 27               | 1                | H              | -3.81241000            | 1.66554200  | -0.01661900 |
| 28               | 6                | C              | 0.62540000             | -2.53157100 | -0.30744000 |
| 29               | 6                | C              | 0.62549300             | 2.53156800  | -0.30746600 |
| 30               | 1                | H              | 1.34718200             | 3.33816200  | -0.48926600 |
| 31               | 1                | H              | 1.34706000             | -3.33818900 | -0.48924600 |
| 32               | 7                | N              | -1.66351000            | -1.73102300 | -0.10101200 |
| 33               | 7                | N              | -1.66344100            | 1.73109600  | -0.10101400 |
| 34               | 8                | O              | -0.64022600            | -0.00014100 | 2.34395300  |

S 11

|    |   |   |             |             |            |
|----|---|---|-------------|-------------|------------|
| 35 | 1 | H | -0.47578100 | 0.77040500  | 2.90610200 |
| 36 | 1 | H | -0.47688700 | -0.77115500 | 2.90578200 |

|    |   |   |             |             |             |
|----|---|---|-------------|-------------|-------------|
| 33 | 7 | N | -1.67238000 | 1.76967600  | -0.05429200 |
| 34 | 8 | O | -0.26862400 | -0.56004600 | 2.14431100  |
| 35 | 1 | H | 0.54402500  | -0.28177500 | 2.61805600  |

32'

| Center Number | Atomic Number | Atomic Type | Coordinates(Angstroms) |             |             |
|---------------|---------------|-------------|------------------------|-------------|-------------|
|               |               |             | X                      | Y           | Z           |
| 1             | 29            | Cu          | -0.60603100            | 0.03415700  | 0.10581700  |
| 2             | 7             | N           | 0.94978100             | 1.31510600  | -0.09511000 |
| 3             | 7             | N           | 0.93288900             | -1.28458700 | -0.12974800 |
| 4             | 6             | C           | 4.62403300             | -0.71719100 | -0.12620700 |
| 5             | 6             | C           | 3.41820700             | -1.41748700 | -0.12847100 |
| 6             | 6             | C           | 2.20926400             | -0.70716700 | -0.12096200 |
| 7             | 6             | C           | 2.21921200             | 0.71686400  | -0.10408300 |
| 8             | 6             | C           | 3.43991300             | 1.40628900  | -0.09569600 |
| 9             | 6             | C           | 4.63468000             | 0.68698100  | -0.10966700 |
| 10            | 1             | H           | 5.56722000             | -1.26766800 | -0.13134500 |
| 11            | 1             | H           | 3.42463900             | -2.50892000 | -0.13212700 |
| 12            | 1             | H           | 3.46546500             | 2.49717100  | -0.07146900 |
| 13            | 1             | H           | 5.58633300             | 1.22265300  | -0.10186800 |
| 14            | 6             | C           | -2.93652100            | -2.15629100 | -0.15751400 |
| 15            | 6             | C           | -0.85105500            | -2.76635800 | -0.24878100 |
| 16            | 6             | C           | -1.60522000            | -3.92318200 | -0.33012700 |
| 17            | 7             | N           | -2.90696600            | -3.51100400 | -0.26921900 |
| 18            | 1             | H           | -3.72401600            | -4.11855800 | -0.30340800 |
| 19            | 1             | H           | -3.86010300            | -1.58373600 | -0.08935100 |
| 20            | 1             | H           | -1.31956700            | -4.96915300 | -0.42307600 |
| 21            | 6             | C           | -1.52618900            | 4.01369000  | -0.25441200 |
| 22            | 6             | C           | -0.79319400            | 2.84416700  | -0.18191900 |
| 23            | 6             | C           | -2.88958000            | 2.27424500  | -0.04679900 |
| 24            | 7             | N           | -2.83542400            | 3.62607700  | -0.16626700 |
| 25            | 1             | H           | -3.64110800            | 4.24925800  | -0.18776000 |
| 26            | 1             | H           | -1.22325500            | 5.05383700  | -0.35694900 |
| 27            | 1             | H           | -3.82203400            | 1.71906900  | 0.04159100  |
| 28            | 6             | C           | 0.56829600             | -2.51916500 | -0.26388200 |
| 29            | 6             | C           | 0.62167600             | 2.55997000  | -0.21597300 |
| 30            | 1             | H           | 1.35161200             | 3.36802000  | -0.35145400 |
| 31            | 1             | H           | 1.27802900             | -3.34368300 | -0.40944300 |
| 32            | 7             | N           | -1.71139700            | -1.67510900 | -0.14502400 |

43'

| Center Number | Atomic Number | Atomic Type | Coordinates(Angstroms) |             |             |
|---------------|---------------|-------------|------------------------|-------------|-------------|
|               |               |             | X                      | Y           | Z           |
| 1             | 29            | Cu          | 0.59379200             | 0.04802900  | 0.06915300  |
| 2             | 7             | N           | -1.10387300            | 1.15026200  | -0.14565100 |
| 3             | 7             | N           | -0.79850200            | -1.41910000 | -0.05258100 |
| 4             | 6             | C           | -4.52506300            | -1.21014100 | -0.00860300 |
| 5             | 6             | C           | -3.25575300            | -1.79746500 | 0.00672300  |
| 6             | 6             | C           | -2.12336900            | -0.98291000 | -0.04760100 |
| 7             | 6             | C           | -2.27576100            | 0.45521800  | -0.10857700 |
| 8             | 6             | C           | -3.57605900            | 1.02396000  | -0.12656200 |
| 9             | 6             | C           | -4.68233200            | 0.19444200  | -0.07652200 |
| 10            | 1             | H           | -5.41108800            | -1.84820800 | 0.03476900  |
| 11            | 1             | H           | -3.16560400            | -2.88334600 | 0.06661500  |
| 12            | 1             | H           | -3.70627400            | 2.10624100  | -0.17202900 |
| 13            | 1             | H           | -5.68634800            | 0.62424700  | -0.08478200 |
| 14            | 6             | C           | 3.12535800             | -1.91306000 | -0.13697900 |
| 15            | 6             | C           | 1.10933300             | -2.73193500 | -0.15219800 |
| 16            | 6             | C           | 1.97565800             | -3.80928600 | -0.24374000 |
| 17            | 7             | N           | 3.22780300             | -3.26716500 | -0.23098900 |
| 18            | 1             | H           | 4.10147100             | -3.78978200 | -0.28807300 |
| 19            | 1             | H           | 3.98901100             | -1.24947700 | -0.11351600 |
| 20            | 1             | H           | 1.79451700             | -4.88037500 | -0.31559600 |
| 21            | 6             | C           | 1.13090800             | 4.12599900  | -0.36274900 |
| 22            | 6             | C           | 0.44939400             | 2.84976600  | -0.24916200 |
| 23            | 6             | C           | 2.58724300             | 2.56731600  | -0.20134300 |
| 24            | 7             | N           | 2.42873500             | 3.92487400  | -0.33440700 |
| 25            | 1             | H           | 0.68034200             | 5.11651100  | -0.46335900 |
| 26            | 1             | H           | 3.57435400             | 2.10343300  | -0.14511400 |
| 27            | 6             | C           | -0.32531800            | -2.62384300 | -0.14014700 |
| 28            | 6             | C           | -0.89351000            | 2.46030000  | -0.23933000 |
| 29            | 1             | H           | -1.70339400            | 3.19463800  | -0.31305500 |
| 30            | 1             | H           | -0.95417000            | -3.51970400 | -0.22119800 |
| 31            | 7             | N           | 1.85935300             | -1.55682200 | -0.08677500 |

|    |   |   |            |            |             |
|----|---|---|------------|------------|-------------|
| 32 | 7 | N | 1.44928900 | 1.87964200 | -0.15472000 |
| 33 | 8 | O | 0.73999600 | 0.76583600 | 2.11965700  |
| 34 | 1 | H | 1.58323900 | 0.87429300 | 2.60926300  |

|    |   |   |            |             |             |
|----|---|---|------------|-------------|-------------|
| 32 | 7 | N | 1.38295600 | 1.95326200  | -0.11575300 |
| 33 | 8 | O | 0.52761800 | 0.22102600  | 2.32537400  |
| 34 | 1 | H | 0.90877200 | 0.94570500  | 2.84222000  |
| 35 | 1 | H | 0.33622600 | -0.48211300 | 2.96225800  |

<sup>32</sup>

| Center Number | Atomic Number | Atomic Type | Coordinates(Angstroms) |             |             |
|---------------|---------------|-------------|------------------------|-------------|-------------|
|               |               |             | X                      | Y           | Z           |
| 1             | 29            | Cu          | 0.59891300             | 0.10533700  | 0.13126200  |
| 2             | 7             | N           | -1.13780000            | 1.14109300  | -0.14973700 |
| 3             | 7             | N           | -0.73530300            | -1.41583100 | -0.08045100 |
| 4             | 6             | C           | -4.46833600            | -1.35132500 | -0.08177700 |
| 5             | 6             | C           | -3.17724300            | -1.88805300 | -0.05349300 |
| 6             | 6             | C           | -2.07606200            | -1.02967900 | -0.08297300 |
| 7             | 6             | C           | -2.28323200            | 0.40098400  | -0.13104800 |
| 8             | 6             | C           | -3.60377100            | 0.91786400  | -0.16341400 |
| 9             | 6             | C           | -4.67871000            | 0.04560400  | -0.13820400 |
| 10            | 1             | H           | -5.32913000            | -2.02389600 | -0.05758900 |
| 11            | 1             | H           | -3.04414500            | -2.97010900 | -0.00243800 |
| 12            | 1             | H           | -3.77487500            | 1.99496800  | -0.19816300 |
| 13            | 1             | H           | -5.69817400            | 0.43690900  | -0.15682200 |
| 14            | 6             | C           | 3.20546100             | -1.76129200 | -0.16289100 |
| 15            | 6             | C           | 1.22186500             | -2.64775100 | -0.25225200 |
| 16            | 6             | C           | 2.12658300             | -3.68670800 | -0.40215000 |
| 17            | 7             | N           | 3.35844400             | -3.10312900 | -0.34049600 |
| 18            | 1             | H           | 4.25061800             | -3.58959500 | -0.42099800 |
| 19            | 1             | H           | 4.04390800             | -1.07001200 | -0.08650500 |
| 20            | 1             | H           | 1.98458700             | -4.75654200 | -0.54450200 |
| 21            | 6             | C           | 1.00464900             | 4.18324900  | -0.42044800 |
| 22            | 6             | C           | 0.35937400             | 2.88619800  | -0.27594300 |
| 23            | 6             | C           | 2.49673800             | 2.67223400  | -0.16960900 |
| 24            | 7             | N           | 2.30298700             | 4.02541400  | -0.35256500 |
| 25            | 1             | H           | 0.52376400             | 5.15362100  | -0.56691600 |
| 26            | 1             | H           | 3.49631300             | 2.24227800  | -0.07741600 |
| 27            | 6             | C           | -0.21680800            | -2.59188200 | -0.25258600 |
| 28            | 6             | C           | -0.97195400            | 2.45268000  | -0.28843200 |
| 29            | 1             | H           | -1.80315100            | 3.15426600  | -0.42255200 |
| 30            | 1             | H           | -0.81065800            | -3.50024400 | -0.41818800 |
| 31            | 7             | N           | 1.92803100             | -1.45380200 | -0.10537800 |

<sup>36</sup>

| Center Number | Atomic Number | Atomic Type | Coordinates(Angstroms) |             |             |
|---------------|---------------|-------------|------------------------|-------------|-------------|
|               |               |             | X                      | Y           | Z           |
| 1             | 29            | Cu          | -0.74008600            | 0.67732700  | 0.40988100  |
| 2             | 7             | N           | -0.52634400            | -1.26063400 | 1.04031300  |
| 3             | 7             | N           | -2.54082200            | -0.10605100 | -0.08421800 |
| 4             | 6             | C           | -3.60704800            | -3.64291100 | -0.43217000 |
| 5             | 6             | C           | -3.67526900            | -2.26310500 | -0.53422600 |
| 6             | 6             | C           | -2.61818100            | -1.46905600 | -0.03711800 |
| 7             | 6             | C           | -1.48439900            | -2.11628600 | 0.58587700  |
| 8             | 6             | C           | -1.44052000            | -3.52805100 | 0.66313400  |
| 9             | 6             | C           | -2.48905000            | -4.27719900 | 0.16379300  |
| 10            | 1             | H           | -4.42222200            | -4.25371700 | -0.82723500 |
| 11            | 1             | H           | -4.53463400            | -1.79013000 | -1.01221600 |
| 12            | 1             | H           | -0.57375200            | -4.02090200 | 1.10564300  |
| 13            | 1             | H           | -2.45385000            | -5.36733900 | 0.21810100  |
| 14            | 6             | C           | -1.68309900            | 3.74369700  | 0.12608200  |
| 15            | 6             | C           | -3.02298400            | 2.13550600  | -0.36983400 |
| 16            | 6             | C           | -3.63042100            | 3.38964500  | -0.67188500 |
| 17            | 7             | N           | -2.79502000            | 4.37410400  | -0.36009800 |
| 18            | 1             | H           | -0.80104200            | 4.28927900  | 0.46525800  |
| 19            | 1             | H           | -4.62175900            | 3.56708900  | -1.09347800 |
| 20            | 6             | C           | 2.84403500             | -0.23863000 | 2.17781200  |
| 21            | 6             | C           | 1.45521300             | -0.38702000 | 1.81624000  |
| 22            | 6             | C           | 2.08126000             | 1.64141300  | 1.50132300  |
| 23            | 7             | N           | 3.21315200             | 1.01255300  | 1.97650400  |
| 24            | 1             | H           | 3.53036700             | -1.02003000 | 2.50423700  |
| 25            | 1             | H           | 2.07442300             | 2.69131400  | 1.21255400  |
| 26            | 6             | C           | -3.41918200            | 0.79321200  | -0.48255800 |
| 27            | 6             | C           | 0.63174500             | -1.51000100 | 1.61346300  |
| 28            | 1             | H           | 0.98274800             | -2.51786000 | 1.86177000  |
| 29            | 1             | H           | -4.41168200            | 0.52642700  | -0.86838600 |
| 30            | 7             | N           | -1.76209700            | 2.42115100  | 0.15072700  |

|    |    |   |            |             |             |
|----|----|---|------------|-------------|-------------|
| 31 | 7  | N | 1.01156200 | 0.86168200  | 1.42637900  |
| 32 | 8  | O | 0.07544600 | 0.65009100  | -1.54606700 |
| 33 | 1  | H | 1.07295700 | 0.82465600  | -1.45012700 |
| 34 | 15 | P | 3.54086400 | -0.11275200 | -1.09920700 |
| 35 | 8  | O | 3.90379400 | -0.71807700 | -2.48689800 |
| 36 | 8  | O | 4.92155500 | 0.28505100  | -0.35134100 |
| 37 | 1  | H | 4.71947600 | 0.83397500  | 0.42821200  |
| 38 | 8  | O | 2.62365000 | 1.11057000  | -1.12317400 |
| 39 | 8  | O | 2.91812400 | -1.36367000 | -0.40287100 |
| 40 | 8  | O | 0.53088700 | -1.64295900 | -1.59475500 |
| 41 | 1  | H | 1.42448400 | -1.63131100 | -1.15788000 |
| 42 | 1  | H | 0.72074300 | -1.39760100 | -2.51089700 |

<sup>3</sup>TS1

| Center Number | Atomic Number | Atomic Type | Coordinates(Angstroms) |             |             |
|---------------|---------------|-------------|------------------------|-------------|-------------|
|               |               |             | X                      | Y           | Z           |
| 1             | 29            | Cu          | 0.66654200             | 0.59039600  | -0.51121300 |
| 2             | 7             | N           | 0.99651700             | -1.37137300 | -0.90640500 |
| 3             | 7             | N           | 2.59949700             | 0.39907200  | 0.06010200  |
| 4             | 6             | C           | 4.54231100             | -2.65871400 | 0.88418800  |
| 5             | 6             | C           | 4.23814400             | -1.30814300 | 0.80436200  |
| 6             | 6             | C           | 3.03545800             | -0.89348100 | 0.19314200  |
| 7             | 6             | C           | 2.13197800             | -1.88529100 | -0.33976400 |
| 8             | 6             | C           | 2.46437500             | -3.25271800 | -0.23316100 |
| 9             | 6             | C           | 3.65519000             | -3.63017700 | 0.36768500  |
| 10            | 1             | H           | 5.47338900             | -2.97680600 | 1.35876500  |
| 11            | 1             | H           | 4.92167100             | -0.56624900 | 1.22099500  |
| 12            | 1             | H           | 1.78115900             | -4.01020600 | -0.62004000 |
| 13            | 1             | H           | 3.90875800             | -4.68949500 | 0.44955800  |
| 14            | 6             | C           | 0.63245300             | 3.79423100  | -0.36763600 |
| 15            | 6             | C           | 2.40048500             | 2.69714400  | 0.17797100  |
| 16            | 6             | C           | 2.60059800             | 4.09366400  | 0.39823600  |
| 17            | 7             | N           | 1.50370400             | 4.75921000  | 0.05534200  |
| 18            | 1             | H           | -0.37953100            | 4.02219000  | -0.70593500 |
| 19            | 1             | H           | 3.49456800             | 4.58704900  | 0.78489000  |
| 20            | 6             | C           | -2.48971400            | -1.41754800 | -2.12222200 |
| 21            | 6             | C           | -1.14107400            | -1.16457200 | -1.74773500 |
| 22            | 6             | C           | -2.23165100            | 0.69000600  | -1.82259000 |

|    |    |   |             |             |             |
|----|----|---|-------------|-------------|-------------|
| 23 | 7  | N | -3.15686600 | -0.26387800 | -2.16029000 |
| 24 | 1  | H | -2.96658500 | -2.38096000 | -2.30311800 |
| 25 | 1  | H | -2.48570500 | 1.74523900  | -1.72757100 |
| 26 | 6  | C | 3.17335300  | 1.54026500  | 0.38288100  |
| 27 | 6  | C | -0.05963100 | -1.98925100 | -1.38584600 |
| 28 | 1  | H | -0.13493600 | -3.08082700 | -1.45992100 |
| 29 | 1  | H | 4.19182500  | 1.60315800  | 0.78805000  |
| 30 | 7  | N | 1.11267100  | 2.55752900  | -0.32463900 |
| 31 | 7  | N | -1.02348500 | 0.20865700  | -1.57434300 |
| 32 | 8  | O | -0.08699200 | 0.20488600  | 1.40008100  |
| 33 | 1  | H | -1.01784500 | 0.54246600  | 1.40732100  |
| 34 | 15 | P | -3.70831300 | -0.18507200 | 1.12040400  |
| 35 | 8  | O | -4.32979200 | -0.05943800 | 2.53776000  |
| 36 | 8  | O | -4.87560700 | -0.04822900 | 0.03916600  |
| 37 | 1  | H | -4.53410300 | -0.16934800 | -0.88073000 |
| 38 | 8  | O | -2.71234900 | 0.99242600  | 1.10246700  |
| 39 | 8  | O | -3.01730100 | -1.56343000 | 0.82911100  |
| 40 | 8  | O | -0.65209500 | -1.70275900 | 1.46000400  |
| 41 | 1  | H | -1.97124900 | -1.63120600 | 1.15295500  |
| 42 | 1  | H | -0.53124400 | -1.64506900 | 2.41974100  |

<sup>37</sup>

| Center Number | Atomic Number | Atomic Type | Coordinates(Angstroms) |             |             |
|---------------|---------------|-------------|------------------------|-------------|-------------|
|               |               |             | X                      | Y           | Z           |
| 1             | 29            | Cu          | -0.61366100            | 0.10108800  | -0.15974700 |
| 2             | 7             | N           | 0.90333500             | -1.23238800 | -0.32851400 |
| 3             | 7             | N           | 0.99057400             | 1.34107600  | -0.17475000 |
| 4             | 6             | C           | 4.62731000             | 0.63048400  | -0.14115900 |
| 5             | 6             | C           | 3.46832400             | 1.38344100  | -0.12546300 |
| 6             | 6             | C           | 2.21151700             | 0.73499000  | -0.18247300 |
| 7             | 6             | C           | 2.16060900             | -0.71715400 | -0.26104600 |
| 8             | 6             | C           | 3.36985000             | -1.45522300 | -0.27264100 |
| 9             | 6             | C           | 4.57806900             | -0.78874500 | -0.21373600 |
| 10            | 1             | H           | 5.59768000             | 1.12969600  | -0.09569400 |
| 11            | 1             | H           | 3.52231800             | 2.47155500  | -0.06622600 |
| 12            | 1             | H           | 3.34620600             | -2.54446300 | -0.32841100 |
| 13            | 1             | H           | 5.51121700             | -1.35609700 | -0.22248300 |
| 14            | 6             | C           | -2.80048200            | 2.42177200  | -0.20062900 |

|    |   |   |             |             |             |
|----|---|---|-------------|-------------|-------------|
| 15 | 6 | C | -0.70170400 | 2.91030800  | -0.18389200 |
| 16 | 6 | C | -1.48911900 | 4.10931000  | -0.18666800 |
| 17 | 7 | N | -2.77191300 | 3.79212800  | -0.19560300 |
| 18 | 1 | H | -3.73488100 | 1.85797000  | -0.21065500 |
| 19 | 1 | H | -1.13306100 | 5.14149000  | -0.18263300 |
| 20 | 6 | C | -1.75484600 | -3.81777300 | -0.55718400 |
| 21 | 6 | C | -0.89044200 | -2.67497500 | -0.46413400 |
| 22 | 6 | C | -2.95126100 | -2.04900900 | -0.46650000 |
| 23 | 7 | N | -3.01324500 | -3.41729400 | -0.55558000 |
| 24 | 1 | H | -1.46621500 | -4.86884800 | -0.62191600 |
| 25 | 1 | H | -3.84671100 | -1.42539500 | -0.44532200 |
| 26 | 6 | C | 0.66810700  | 2.62997100  | -0.17862500 |
| 27 | 6 | C | 0.49450200  | -2.49150600 | -0.42014900 |
| 28 | 1 | H | 1.18479700  | -3.34207800 | -0.46163600 |
| 29 | 1 | H | 1.41564000  | 3.43226000  | -0.18689300 |
| 30 | 7 | N | -1.60808700 | 1.84491000  | -0.19353300 |
| 31 | 7 | N | -1.72427500 | -1.55514800 | -0.40966200 |
| 32 | 8 | O | -0.70585400 | -0.14886800 | 2.16137300  |
| 33 | 8 | O | -0.14986900 | -1.40950600 | 2.56802300  |
| 34 | 1 | H | -0.90954200 | -1.81137000 | 3.02585100  |
| 35 | 1 | H | -0.22281300 | 0.48239200  | 2.72280300  |

|    |   |   |             |             |             |
|----|---|---|-------------|-------------|-------------|
| 14 | 6 | C | 3.01389300  | -2.03506500 | -0.20892400 |
| 15 | 6 | C | 0.96654400  | -2.72808000 | -0.19281800 |
| 16 | 6 | C | 1.88612400  | -3.85880400 | -0.27615900 |
| 17 | 7 | N | 3.11399500  | -3.41295200 | -0.28714900 |
| 18 | 1 | H | 3.89952300  | -1.39556000 | -0.18951900 |
| 19 | 1 | H | 1.63131500  | -4.92089300 | -0.32617000 |
| 20 | 6 | C | 1.30926200  | 4.13907900  | -0.18539200 |
| 21 | 6 | C | 0.55512500  | 2.88694800  | -0.12320200 |
| 22 | 6 | C | 2.67451300  | 2.48346600  | -0.17865200 |
| 23 | 7 | N | 2.58377500  | 3.86832900  | -0.21929200 |
| 24 | 1 | H | 0.90751900  | 5.15579000  | -0.20444400 |
| 25 | 1 | H | 3.64094100  | 1.97392400  | -0.19283100 |
| 26 | 6 | C | -0.40300900 | -2.60766000 | -0.14969300 |
| 27 | 6 | C | -0.78367400 | 2.57572800  | -0.08297500 |
| 28 | 1 | H | -1.56415800 | 3.34343400  | -0.09066300 |
| 29 | 1 | H | -1.06619500 | -3.47840000 | -0.17874300 |
| 30 | 7 | N | 1.77717300  | -1.57515000 | -0.16253300 |
| 31 | 7 | N | 1.51738200  | 1.85747400  | -0.12279200 |
| 32 | 8 | O | 1.24285100  | -0.41144700 | 2.13861700  |

45

| Center Number | Atomic Number | Atomic Type | Coordinates(Angstroms) |             |             |
|---------------|---------------|-------------|------------------------|-------------|-------------|
|               |               |             | X                      | Y           | Z           |
| 1             | 29            | Cu          | 0.60926500             | 0.07427900  | 0.01394000  |
| 2             | 7             | N           | -1.05751600            | 1.24333200  | -0.04679900 |
| 3             | 7             | N           | -0.86487600            | -1.33051100 | -0.07951500 |
| 4             | 6             | C           | -4.52086600            | -1.03293100 | -0.04248500 |
| 5             | 6             | C           | -3.30802100            | -1.66753800 | -0.05802000 |
| 6             | 6             | C           | -2.11311100            | -0.88241800 | -0.05380600 |
| 7             | 6             | C           | -2.22467400            | 0.61644500  | -0.03426000 |
| 8             | 6             | C           | -3.52306800            | 1.21827200  | -0.01999500 |
| 9             | 6             | C           | -4.62893400            | 0.41285800  | -0.02339800 |
| 10            | 1             | H           | -5.44148800            | -1.62270300 | -0.04276000 |
| 11            | 1             | H           | -3.25409300            | -2.75690600 | -0.06988300 |
| 12            | 1             | H           | -3.62833200            | 2.30383800  | -0.00299200 |
| 13            | 1             | H           | -5.62668700            | 0.85952000  | -0.00995300 |

48

| Center Number | Atomic Number | Atomic Type | Coordinates(Angstroms) |             |             |
|---------------|---------------|-------------|------------------------|-------------|-------------|
|               |               |             | X                      | Y           | Z           |
| 1             | 29            | Cu          | -0.49919300            | 0.32160000  | -0.09489400 |
| 2             | 7             | N           | 0.49270700             | -1.45424500 | -0.28080000 |
| 3             | 7             | N           | 1.45571500             | 0.93322000  | -0.09289300 |
| 4             | 6             | C           | 4.60910700             | -0.95749900 | -0.04194300 |
| 5             | 6             | C           | 3.79345800             | 0.14692400  | -0.01020000 |
| 6             | 6             | C           | 2.37968900             | -0.02835500 | -0.08801700 |
| 7             | 6             | C           | 1.82376800             | -1.40729100 | -0.19862000 |
| 8             | 6             | C           | 2.71905000             | -2.51709300 | -0.22961400 |
| 9             | 6             | C           | 4.07175500             | -2.29026000 | -0.15269200 |
| 10            | 1             | H           | 5.69335300             | -0.83294900 | 0.01810700  |
| 11            | 1             | H           | 4.22215300             | 1.14635700  | 0.07561100  |
| 12            | 1             | H           | 2.33507400             | -3.53471400 | -0.31345900 |
| 13            | 1             | H           | 4.76539600             | -3.13470600 | -0.17473000 |
| 14            | 6             | C           | -1.70834500            | 3.27466300  | -0.26596400 |
| 15            | 6             | C           | 0.42282400             | 2.99191700  | -0.13315600 |

|    |   |   |             |             |             |
|----|---|---|-------------|-------------|-------------|
| 16 | 6 | C | 0.10135700  | 4.41841300  | -0.16532000 |
| 17 | 7 | N | -1.19197600 | 4.56278600  | -0.24699700 |
| 18 | 1 | H | -2.78329800 | 3.09146400  | -0.33091000 |
| 19 | 1 | H | 0.80129800  | 5.25750700  | -0.13192400 |
| 20 | 6 | C | -2.88668700 | -2.99009400 | -0.71911000 |
| 21 | 6 | C | -1.66847600 | -2.19878100 | -0.55292200 |
| 22 | 6 | C | -3.38767000 | -0.90745300 | -0.64824000 |
| 23 | 7 | N | -3.91275900 | -2.18797600 | -0.77164700 |
| 24 | 1 | H | -2.96715800 | -4.07791800 | -0.79048800 |
| 25 | 1 | H | -4.02945900 | -0.02344200 | -0.66573400 |
| 26 | 6 | C | 1.60367600  | 2.27652200  | -0.07529000 |
| 27 | 6 | C | -0.32957500 | -2.51501600 | -0.44228200 |
| 28 | 1 | H | 0.03066400  | -3.54782500 | -0.49421600 |
| 29 | 1 | H | 2.58041700  | 2.77033800  | -0.03516300 |
| 30 | 7 | N | -0.80608000 | 2.31564500  | -0.20071400 |
| 31 | 7 | N | -2.07930700 | -0.85733700 | -0.51392500 |
| 32 | 8 | O | -0.51874200 | 0.21034000  | 2.15327300  |
| 33 | 8 | O | -1.86799700 | -1.52456500 | 2.43038400  |
| 34 | 1 | H | -1.42195700 | -1.85843600 | 3.22774600  |
| 35 | 1 | H | -2.62767400 | -1.03251200 | 2.78688100  |
| 36 | 8 | O | -0.49919300 | 0.32160000  | -0.09489400 |
| 37 | 1 | H | 0.49270700  | -1.45424500 | -0.28080000 |
| 38 | 1 | H | 1.45571500  | 0.93322000  | -0.09289300 |
| 39 | 8 | O | 4.60910700  | -0.95749900 | -0.04194300 |
| 40 | 1 | H | 3.79345800  | 0.14692400  | -0.01020000 |
| 41 | 1 | H | 2.37968900  | -0.02835500 | -0.08801700 |
| 42 | 8 | O | 1.82376800  | -1.40729100 | -0.19862000 |
| 43 | 1 | H | 2.71905000  | -2.51709300 | -0.22961400 |
| 44 | 1 | H | 4.07175500  | -2.29026000 | -0.15269200 |

|    |   |   |             |             |             |
|----|---|---|-------------|-------------|-------------|
| 6  | 6 | C | 2.35546000  | -0.13852900 | -0.10082900 |
| 7  | 6 | C | 1.71981300  | -1.47856000 | -0.24528200 |
| 8  | 6 | C | 2.54529900  | -2.63812000 | -0.29287600 |
| 9  | 6 | C | 3.90971500  | -2.49520300 | -0.19829400 |
| 10 | 1 | H | 5.61395700  | -1.14316100 | 0.02194700  |
| 11 | 1 | H | 4.26232800  | 0.91950700  | 0.10852600  |
| 12 | 1 | H | 2.10140900  | -3.62885500 | -0.39995300 |
| 13 | 1 | H | 4.55057600  | -3.38016800 | -0.23012800 |
| 14 | 6 | C | -1.52868400 | 3.39989800  | -0.19129600 |
| 15 | 6 | C | 0.58462900  | 2.99496300  | -0.07634300 |
| 16 | 6 | C | 0.34368800  | 4.43759100  | -0.06861600 |
| 17 | 7 | N | -0.93969700 | 4.65589000  | -0.14022700 |
| 18 | 1 | H | -2.61258100 | 3.27963500  | -0.25533200 |
| 19 | 1 | H | 1.08960400  | 5.23512400  | -0.01597900 |
| 20 | 6 | C | -3.09121100 | -2.75990900 | -0.71677600 |
| 21 | 6 | C | -1.82095200 | -2.04864900 | -0.57933200 |
| 22 | 6 | C | -3.46450900 | -0.65742900 | -0.53924000 |
| 23 | 7 | N | -4.06857500 | -1.89732100 | -0.68761500 |
| 24 | 1 | H | -3.24019300 | -3.83748200 | -0.82481400 |
| 25 | 1 | H | -4.05193300 | 0.26227900  | -0.48727100 |
| 26 | 6 | C | 1.72165500  | 2.21059400  | -0.04073900 |
| 27 | 6 | C | -0.50047100 | -2.44876400 | -0.51950200 |
| 28 | 1 | H | -0.20449800 | -3.49886000 | -0.61377900 |
| 29 | 1 | H | 2.72623600  | 2.64346300  | 0.01191300  |
| 30 | 7 | N | -0.68151400 | 2.39082300  | -0.15638700 |
| 31 | 7 | N | -2.14855200 | -0.68873900 | -0.46993700 |
| 32 | 8 | O | -0.25762000 | -0.25826600 | 1.98307400  |
| 33 | 8 | O | -1.91600200 | -1.71604000 | 2.41564900  |
| 34 | 1 | H | -0.82659300 | -1.13336700 | 2.42184100  |
| 35 | 1 | H | -2.49567400 | -1.25220100 | 3.05748400  |
| 36 | 8 | O | -0.49223500 | 0.39013500  | -0.10416200 |
| 37 | 1 | H | 0.38770700  | -1.44668000 | -0.33797000 |
| 38 | 1 | H | 1.49349900  | 0.87956800  | -0.09361300 |
| 39 | 8 | O | 4.52503600  | -1.20106400 | -0.05288000 |
| 40 | 1 | H | 3.77571000  | -0.05017900 | -0.00521200 |
| 41 | 1 | H | 2.35546000  | -0.13852900 | -0.10082900 |
| 42 | 8 | O | 1.71981300  | -1.47856000 | -0.24528200 |
| 43 | 1 | H | 2.54529900  | -2.63812000 | -0.29287600 |
| 44 | 1 | H | 3.90971500  | -2.49520300 | -0.19829400 |

<sup>4</sup>TS2

| Center Number | Atomic Number | Atomic Type | Coordinates(Angstroms) |             |             |
|---------------|---------------|-------------|------------------------|-------------|-------------|
|               |               |             | X                      | Y           | Z           |
| 1             | 29            | Cu          | -0.49223500            | 0.39013500  | -0.10416200 |
| 2             | 7             | N           | 0.38770700             | -1.44668000 | -0.33797000 |
| 3             | 7             | N           | 1.49349900             | 0.87956800  | -0.09361300 |
| 4             | 6             | C           | 4.52503600             | -1.20106400 | -0.05288000 |
| 5             | 6             | C           | 3.77571000             | -0.05017900 | -0.00521200 |



49

| Center<br>Number | Atomic<br>Number | Atomic<br>Type | Coordinates(Angstroms) |             |             |
|------------------|------------------|----------------|------------------------|-------------|-------------|
|                  |                  |                | X                      | Y           | Z           |
| 1                | 29               | Cu             | -1.21047300            | -0.61528600 | -0.30701000 |
| 2                | 7                | N              | 0.27662700             | 0.52429900  | -1.07743200 |
| 3                | 7                | N              | -2.04101800            | 1.22757400  | -0.21421400 |
| 4                | 6                | C              | -0.46750100            | 4.57129100  | -0.52633700 |
| 5                | 6                | C              | -1.46307000            | 3.63805500  | -0.28201700 |
| 6                | 6                | C              | -1.18884900            | 2.26805900  | -0.46457800 |
| 7                | 6                | C              | 0.12229600             | 1.86499500  | -0.93017500 |
| 8                | 6                | C              | 1.13018900             | 2.83926900  | -1.13585700 |
| 9                | 6                | C              | 0.82929700             | 4.17233900  | -0.94008800 |
| 10               | 1                | H              | -0.67720900            | 5.63295300  | -0.37579500 |
| 11               | 1                | H              | -2.44467600            | 3.96004200  | 0.06908900  |
| 12               | 1                | H              | 2.14086000             | 2.52390600  | -1.39079000 |
| 13               | 1                | H              | 1.60341100             | 4.92892100  | -1.08382400 |
| 14               | 6                | C              | -3.87138600            | -2.20040100 | 0.47653500  |
| 15               | 6                | C              | -3.86614200            | -0.04691300 | 0.40326200  |
| 16               | 6                | C              | -5.14250500            | -0.51950900 | 0.81581400  |
| 17               | 7                | N              | -5.13321900            | -1.84993100 | 0.85556200  |
| 18               | 1                | H              | -3.54370700            | -3.23931000 | 0.41230500  |
| 19               | 1                | H              | -6.02404700            | 0.07201700  | 1.07007700  |
| 20               | 6                | C              | 2.16478500             | -2.64187500 | -1.48270300 |
| 21               | 6                | C              | 1.23657200             | -1.54907300 | -1.33427000 |
| 22               | 6                | C              | 0.27739000             | -3.40622200 | -0.83575400 |
| 23               | 7                | N              | 1.55512400             | -3.77330500 | -1.18358000 |
| 24               | 1                | H              | 3.22088900             | -2.55671700 | -1.73879700 |
| 25               | 1                | H              | -0.47344500            | -4.13325300 | -0.52103000 |
| 26               | 6                | C              | -3.29664400            | 1.21967000  | 0.18687700  |
| 27               | 6                | C              | 1.35124100             | -0.15964400 | -1.45157900 |
| 28               | 1                | H              | 2.28532500             | 0.30238600  | -1.78026200 |
| 29               | 1                | H              | -3.87722200            | 2.13803700  | 0.34200600  |
| 30               | 7                | N              | -3.07487800            | -1.17715400 | 0.19299600  |
| 31               | 7                | N              | 0.03104800             | -2.10654800 | -0.90812900 |
| 32               | 8                | O              | -0.00116000            | -0.75077100 | 1.55132000  |
| 33               | 15               | P              | 3.56184700             | -0.11542300 | 0.86393400  |
| 34               | 8                | O              | 4.89392700             | 0.08412200  | 1.63701800  |

|    |   |   |            |             |             |
|----|---|---|------------|-------------|-------------|
| 35 | 8 | O | 2.76430500 | -1.38102800 | 1.52209400  |
| 36 | 1 | H | 1.82302900 | -1.17852900 | 1.68580700  |
| 37 | 8 | O | 2.57799100 | 1.06909200  | 0.86291900  |
| 38 | 8 | O | 4.08900800 | -0.51251800 | -0.53104600 |
| 39 | 8 | O | 0.37451900 | 1.31352200  | 1.97803500  |
| 40 | 1 | H | 0.53781600 | 1.09572400  | 2.90836500  |
| 41 | 1 | H | 1.32646000 | 1.23432200  | 1.53319600  |

<sup>4</sup>TS3

| Center<br>Number | Atomic<br>Number | Atomic<br>Type | Coordinates(Angstroms) |             |             |
|------------------|------------------|----------------|------------------------|-------------|-------------|
|                  |                  |                | X                      | Y           | Z           |
| 1                | 29               | Cu             | 0.99974100             | -0.68649400 | 0.25269900  |
| 2                | 7                | N              | 0.13156600             | 0.96899300  | 1.05253500  |
| 3                | 7                | N              | 2.47785800             | 0.70653400  | 0.03814400  |
| 4                | 6                | C              | 2.22989800             | 4.41081000  | -0.00397200 |
| 5                | 6                | C              | 2.79834400             | 3.15742200  | -0.17509900 |
| 6                | 6                | C              | 2.06612300             | 2.00438600  | 0.17699100  |
| 7                | 6                | C              | 0.73766600             | 2.14900500  | 0.72874900  |
| 8                | 6                | C              | 0.17673700             | 3.43719000  | 0.86828100  |
| 9                | 6                | C              | 0.91919700             | 4.55018200  | 0.51111000  |
| 10               | 1                | H              | 2.79416000             | 5.30284500  | -0.28566300 |
| 11               | 1                | H              | 3.79976100             | 3.06030500  | -0.59815700 |
| 12               | 1                | H              | -0.84462300            | 3.54665600  | 1.23558100  |
| 13               | 1                | H              | 0.48450300             | 5.54696700  | 0.61309400  |
| 14               | 6                | C              | 2.94659300             | -3.21149700 | -0.19055400 |
| 15               | 6                | C              | 3.70957300             | -1.20788600 | -0.35735000 |
| 16               | 6                | C              | 4.73490100             | -2.15121900 | -0.66437800 |
| 17               | 7                | N              | 4.25158900             | -3.38429900 | -0.55575500 |
| 18               | 1                | H              | 2.26708500             | -4.04921400 | -0.02524900 |
| 19               | 1                | H              | 5.76918300             | -1.94469000 | -0.94660700 |
| 20               | 6                | C              | -2.69549700            | -1.21447200 | 1.93792300  |
| 21               | 6                | C              | -1.44769500            | -0.59533500 | 1.64456300  |
| 22               | 6                | C              | -1.44525200            | -2.61669800 | 0.91064100  |
| 23               | 7                | N              | -2.69327200            | -2.45530900 | 1.45066000  |
| 24               | 1                | H              | -3.57043900            | -0.75711600 | 2.39853200  |
| 25               | 1                | H              | -1.13028100            | -3.54130200 | 0.42549700  |
| 26               | 6                | C              | 3.64150600             | 0.19636300  | -0.30885500 |
| 27               | 6                | C              | -1.02906500            | 0.74799200  | 1.62869800  |

|    |    |   |             |             |             |
|----|----|---|-------------|-------------|-------------|
| 28 | 1  | H | -1.67444700 | 1.54080600  | 2.02061600  |
| 29 | 1  | H | 4.52033400  | 0.81497800  | -0.53409200 |
| 30 | 7  | N | 2.57025600  | -1.94566300 | -0.05429500 |
| 31 | 7  | N | -0.66184100 | -1.55251400 | 1.01254600  |
| 32 | 8  | O | 0.61837100  | -0.30856100 | -1.80042700 |
| 33 | 15 | P | -3.84725400 | 0.01761500  | -0.86379600 |
| 34 | 8  | O | -4.64075000 | 0.89203700  | -1.84456500 |
| 35 | 8  | O | -4.69978500 | -1.29110800 | -0.49681100 |
| 36 | 1  | H | -4.18027800 | -1.96010400 | -0.00888000 |
| 37 | 8  | O | -2.48947700 | -0.58203100 | -1.40632900 |
| 38 | 8  | O | -3.63569400 | 0.96920600  | 0.33371900  |
| 39 | 8  | O | -0.63233400 | 1.11799000  | -1.70065600 |
| 40 | 1  | H | -0.53238200 | 1.27865700  | -2.65241700 |
| 41 | 1  | H | -1.74014900 | 0.12341300  | -1.54037500 |

|    |   |   |             |             |             |
|----|---|---|-------------|-------------|-------------|
| 21 | 6 | C | -0.90045400 | -2.68983200 | -0.43625100 |
| 22 | 6 | C | -2.95799000 | -2.04993400 | -0.43120700 |
| 23 | 7 | N | -3.02866300 | -3.41622000 | -0.52253300 |
| 24 | 1 | H | -1.49162000 | -4.87849400 | -0.59504700 |
| 25 | 1 | H | -3.84917700 | -1.42036600 | -0.40678100 |
| 26 | 6 | C | 0.67992000  | 2.60962500  | -0.17074100 |
| 27 | 6 | C | 0.48568700  | -2.51304300 | -0.39730600 |
| 28 | 1 | H | 1.17217500  | -3.36633900 | -0.44942800 |
| 29 | 1 | H | 1.42868400  | 3.41034700  | -0.15390900 |
| 30 | 7 | N | -1.59811600 | 1.83021800  | -0.22621200 |
| 31 | 7 | N | -1.72726500 | -1.56396900 | -0.37686100 |
| 32 | 8 | O | -0.65069500 | -0.01708900 | 2.21408200  |
| 33 | 8 | O | -0.34252800 | -1.20991500 | 2.66460200  |
| 34 | 1 | H | -0.49729700 | -1.18173100 | 3.63575000  |

<sup>4</sup>10

| Center Number | Atomic Number | Atomic Type | Coordinates(Angstroms) |             |             |
|---------------|---------------|-------------|------------------------|-------------|-------------|
|               |               |             | X                      | Y           | Z           |
| 1             | 29            | Cu          | -0.60786300            | 0.08736100  | -0.16775200 |
| 2             | 7             | N           | 0.90140900             | -1.25564100 | -0.29969600 |
| 3             | 7             | N           | 0.99966000             | 1.31997400  | -0.18050900 |
| 4             | 6             | C           | 4.63293800             | 0.60003300  | -0.13099400 |
| 5             | 6             | C           | 3.47642400             | 1.35569300  | -0.12059500 |
| 6             | 6             | C           | 2.21709400             | 0.71008700  | -0.17609000 |
| 7             | 6             | C           | 2.16179900             | -0.74258900 | -0.24272500 |
| 8             | 6             | C           | 3.36837800             | -1.48344200 | -0.25081200 |
| 9             | 6             | C           | 4.57887700             | -0.81933300 | -0.19616800 |
| 10            | 1             | H           | 5.60482000             | 1.09642400  | -0.08810900 |
| 11            | 1             | H           | 3.53263600             | 2.44403100  | -0.06897500 |
| 12            | 1             | H           | 3.34235900             | -2.57301600 | -0.30034900 |
| 13            | 1             | H           | 5.51027300             | -1.38968700 | -0.20274300 |
| 14            | 6             | C           | -2.78802700            | 2.41039100  | -0.24410500 |
| 15            | 6             | C           | -0.68876900            | 2.89204600  | -0.19238000 |
| 16            | 6             | C           | -1.47343200            | 4.09463600  | -0.19394900 |
| 17            | 7             | N           | -2.75572800            | 3.78175200  | -0.22549500 |
| 18            | 1             | H           | -3.72416600            | 1.85008800  | -0.27224300 |
| 19            | 1             | H           | -1.11376600            | 5.12536600  | -0.17361400 |
| 20            | 6             | C           | -1.77248000            | -3.82548400 | -0.52835700 |

<sup>4</sup>11

| Center Number | Atomic Number | Atomic Type | Coordinates(Angstroms) |             |             |
|---------------|---------------|-------------|------------------------|-------------|-------------|
|               |               |             | X                      | Y           | Z           |
| 1             | 29            | Cu          | -0.74609400            | 0.59928200  | 0.62546400  |
| 2             | 7             | N           | -1.00163300            | -1.41164100 | 0.78843200  |
| 3             | 7             | N           | -2.60792400            | 0.41187800  | -0.10324800 |
| 4             | 6             | C           | -4.67397500            | -2.60897400 | -0.80553800 |
| 5             | 6             | C           | -4.32432500            | -1.26341800 | -0.75264200 |
| 6             | 6             | C           | -3.08432400            | -0.88016200 | -0.20968600 |
| 7             | 6             | C           | -2.19351100            | -1.89333700 | 0.28296000  |
| 8             | 6             | C           | -2.56939200            | -3.24859400 | 0.21766600  |
| 9             | 6             | C           | -3.79999100            | -3.60151600 | -0.32181000 |
| 10            | 1             | H           | -5.63853300            | -2.89800100 | -1.22929500 |
| 11            | 1             | H           | -5.01061700            | -0.50566900 | -1.13469000 |
| 12            | 1             | H           | -1.89456800            | -4.01984400 | 0.59355600  |
| 13            | 1             | H           | -4.09021700            | -4.65307900 | -0.37162700 |
| 14            | 6             | C           | -0.56775000            | 3.75958000  | 0.38290600  |
| 15            | 6             | C           | -2.33839000            | 2.70389600  | -0.26045100 |
| 16            | 6             | C           | -2.48095800            | 4.08977100  | -0.50553600 |
| 17            | 7             | N           | -1.37953300            | 4.73193300  | -0.10153900 |
| 18            | 1             | H           | 0.42594700             | 3.96221200  | 0.78585300  |
| 19            | 1             | H           | -3.33177200            | 4.60751500  | -0.95211000 |
| 20            | 6             | C           | 2.51994600             | -1.45104500 | 1.92488300  |

|    |    |   |             |             |             |
|----|----|---|-------------|-------------|-------------|
| 21 | 6  | C | 1.16320700  | -1.21008300 | 1.55996900  |
| 22 | 6  | C | 2.18058100  | 0.66246600  | 1.87672400  |
| 23 | 7  | N | 3.13215900  | -0.28153200 | 2.12609100  |
| 24 | 1  | H | 3.03153000  | -2.40945400 | 2.00696500  |
| 25 | 1  | H | 2.38236800  | 1.73142900  | 1.92773900  |
| 26 | 6  | C | -3.12829100 | 1.55647800  | -0.48290000 |
| 27 | 6  | C | 0.07593000  | -2.03966300 | 1.17857900  |
| 28 | 1  | H | 0.17461300  | -3.13204000 | 1.17590500  |
| 29 | 1  | H | -4.11686600 | 1.63278500  | -0.95427600 |
| 30 | 7  | N | -1.08204700 | 2.53273800  | 0.32126300  |
| 31 | 7  | N | 0.99131900  | 0.16195000  | 1.54573200  |
| 32 | 8  | O | 0.39611800  | 0.15379500  | -1.44036800 |
| 33 | 15 | P | 3.78914400  | -0.32050200 | -1.11640800 |
| 34 | 8  | O | 4.34231100  | -0.36372300 | -2.51400600 |
| 35 | 8  | O | 4.93891500  | -0.29159700 | -0.00886800 |
| 36 | 1  | H | 4.56369700  | -0.19538600 | 0.89857500  |
| 37 | 8  | O | 2.95795400  | 1.04169300  | -0.78310100 |
| 38 | 8  | O | 2.79611200  | -1.50160600 | -0.83393600 |
| 39 | 8  | O | 0.52978600  | -1.12811100 | -1.69638200 |
| 40 | 1  | H | 1.55430400  | -1.36777200 | -1.40296400 |
| 41 | 1  | H | 2.02116500  | 0.92237600  | -1.07052900 |

<sup>4</sup>TS4

| Center Number | Atomic Number | Atomic Type | Coordinates(Angstroms) |             |             |
|---------------|---------------|-------------|------------------------|-------------|-------------|
|               |               |             | X                      | Y           | Z           |
| 1             | 29            | Cu          | -0.87439900            | 0.51940100  | 0.64110000  |
| 2             | 7             | N           | -1.36154600            | -1.44898200 | 0.67280900  |
| 3             | 7             | N           | -2.69305800            | 0.59391600  | -0.19730500 |
| 4             | 6             | C           | -5.12230000            | -2.11046700 | -1.05789900 |
| 5             | 6             | C           | -4.59451800            | -0.82419800 | -0.95251500 |
| 6             | 6             | C           | -3.33375900            | -0.62742200 | -0.36560000 |
| 7             | 6             | C           | -2.60445700            | -1.75839400 | 0.11479800  |
| 8             | 6             | C           | -3.15282500            | -3.04394700 | 0.00409400  |
| 9             | 6             | C           | -4.40637900            | -3.21863500 | -0.58088400 |
| 10            | 1             | H           | -6.10398500            | -2.25358100 | -1.51543400 |
| 11            | 1             | H           | -5.16170300            | 0.03006900  | -1.32687800 |
| 12            | 1             | H           | -2.60122200            | -3.90773200 | 0.38075800  |
| 13            | 1             | H           | -4.83079300            | -4.22136200 | -0.66517300 |

|    |    |   |             |             |             |
|----|----|---|-------------|-------------|-------------|
| 14 | 6  | C | -0.29963100 | 3.64248900  | 0.57707900  |
| 15 | 6  | C | -2.14833600 | 2.84425100  | -0.20462300 |
| 16 | 6  | C | -2.11348200 | 4.24412100  | -0.37370300 |
| 17 | 7  | N | -0.96177100 | 4.72742200  | 0.11558600  |
| 18 | 1  | H | 0.68807100  | 3.70003800  | 1.03791600  |
| 19 | 1  | H | -2.87258000 | 4.88519300  | -0.82555200 |
| 20 | 6  | C | 2.11272100  | -1.95912100 | 1.68241900  |
| 21 | 6  | C | 0.79366300  | -1.55423300 | 1.51381900  |
| 22 | 6  | C | 2.01144900  | 0.21039500  | 1.82200000  |
| 23 | 7  | N | 2.86513200  | -0.84062800 | 1.88106900  |
| 24 | 1  | H | 2.55698900  | -2.95042700 | 1.61929200  |
| 25 | 1  | H | 2.34445200  | 1.24413400  | 1.88295800  |
| 26 | 6  | C | -3.05901800 | 1.80929500  | -0.52185100 |
| 27 | 6  | C | -0.39530300 | -2.21974800 | 1.05948500  |
| 28 | 1  | H | -0.43582100 | -3.31559300 | 0.99947000  |
| 29 | 1  | H | -4.01526000 | 2.02943000  | -1.01502100 |
| 30 | 7  | N | -0.95361000 | 2.49012400  | 0.41955500  |
| 31 | 7  | N | 0.76073200  | -0.16533000 | 1.60817100  |
| 32 | 8  | O | 0.74831400  | 0.14295000  | -1.26290000 |
| 33 | 15 | P | 4.23004000  | -0.27547900 | -0.88845300 |
| 34 | 8  | O | 5.33547300  | -0.01085800 | -1.98095400 |
| 35 | 8  | O | 4.86590500  | -0.60015800 | 0.47525100  |
| 36 | 1  | H | 3.99160400  | -0.72039800 | 1.34863500  |
| 37 | 8  | O | 3.32511100  | 1.04950300  | -0.66898100 |
| 38 | 8  | O | 3.35268200  | -1.35859500 | -1.54763700 |
| 39 | 8  | O | 0.90309600  | -1.12430400 | -1.55333900 |
| 40 | 1  | H | 1.96446800  | -1.27513800 | -1.63677100 |
| 41 | 1  | H | 2.42001300  | 0.93464800  | -1.03975100 |

<sup>4</sup>12

| Center Number | Atomic Number | Atomic Type | Coordinates(Angstroms) |             |             |
|---------------|---------------|-------------|------------------------|-------------|-------------|
|               |               |             | X                      | Y           | Z           |
| 1             | 29            | Cu          | -0.72030900            | 0.40287400  | 0.54383500  |
| 2             | 7             | N           | -1.56326100            | -1.44457500 | 0.49789500  |
| 3             | 7             | N           | -2.57230400            | 0.88101500  | -0.05200800 |
| 4             | 6             | C           | -5.46115300            | -1.26974300 | -1.03451900 |
| 5             | 6             | C           | -4.72139700            | -0.10807000 | -0.82095100 |
| 6             | 6             | C           | -3.41603200            | -0.18894500 | -0.30593300 |

|    |    |   |             |             |             |
|----|----|---|-------------|-------------|-------------|
| 7  | 6  | C | -2.86379000 | -1.47492100 | -0.01384100 |
| 8  | 6  | C | -3.62440600 | -2.63235000 | -0.23331800 |
| 9  | 6  | C | -4.91787400 | -2.53034200 | -0.74206200 |
| 10 | 1  | H | -6.47511300 | -1.19542000 | -1.43463200 |
| 11 | 1  | H | -5.15487700 | 0.86559600  | -1.05659100 |
| 12 | 1  | H | -3.20599800 | -3.61367000 | -0.00044400 |
| 13 | 1  | H | -5.50795500 | -3.43334400 | -0.91216400 |
| 14 | 6  | C | 0.41438800  | 3.35971300  | 0.67471200  |
| 15 | 6  | C | -1.64188600 | 2.99391100  | 0.11649800  |
| 16 | 6  | C | -1.35987300 | 4.37660700  | 0.05676600  |
| 17 | 7  | N | -0.08422700 | 4.59036100  | 0.40513900  |
| 18 | 1  | H | 1.45262700  | 3.18490000  | 0.96178400  |
| 19 | 1  | H | -2.03308200 | 5.18719000  | -0.22841400 |
| 20 | 6  | C | 1.76136200  | -2.67474900 | 1.38018000  |
| 21 | 6  | C | 0.55446800  | -2.01116000 | 1.25664900  |
| 22 | 6  | C | 2.03833300  | -0.51719500 | 1.78790000  |
| 23 | 7  | N | 2.67327200  | -1.71667500 | 1.72986800  |
| 24 | 1  | H | 2.03623000  | -3.71169300 | 1.20908500  |
| 25 | 1  | H | 2.56297900  | 0.41752600  | 1.96736300  |
| 26 | 6  | C | -2.74895800 | 2.17319900  | -0.19356000 |
| 27 | 6  | C | -0.73974800 | -2.40617600 | 0.74649200  |
| 28 | 1  | H | -0.96526200 | -3.46505700 | 0.56397500  |
| 29 | 1  | H | -3.69495600 | 2.60776700  | -0.54354900 |
| 30 | 7  | N | -0.46645100 | 2.36988000  | 0.53237900  |
| 31 | 7  | N | 0.75922500  | -0.66133500 | 1.52453600  |
| 32 | 8  | O | 0.60657200  | -0.01551700 | -1.22226000 |
| 33 | 15 | P | 4.06590500  | -0.14335900 | -0.88725300 |
| 34 | 8  | O | 5.28655400  | 0.35033500  | -1.70927700 |
| 35 | 8  | O | 4.71772400  | -0.46512600 | 0.46266200  |
| 36 | 1  | H | 3.69351700  | -1.77961700 | 1.67092500  |
| 37 | 8  | O | 2.94236100  | 0.98141000  | -0.74944700 |
| 38 | 8  | O | 3.37151900  | -1.39950700 | -1.55949700 |
| 39 | 8  | O | 0.82204000  | -1.27336900 | -1.53469100 |
| 40 | 1  | H | 2.34815000  | -1.38756400 | -1.65282000 |
| 41 | 1  | H | -1.33863600 | -0.35980100 | 1.66079700  |

<sup>4</sup>13

Center Atomic Atomic Coordinates(Angstroms)

| Number | Number | Type | X           | Y           | Z           |
|--------|--------|------|-------------|-------------|-------------|
| 1      | 29     | Cu   | 0.79005700  | -0.92011800 | -0.23499500 |
| 2      | 7      | N    | 2.69321300  | 0.62402000  | 0.00550300  |
| 3      | 7      | N    | 0.29000300  | 1.27031500  | -0.80429200 |
| 4      | 6      | C    | 1.65161600  | 4.67598300  | -0.12051100 |
| 5      | 6      | C    | 0.74087700  | 3.69111900  | -0.49267700 |
| 6      | 6      | C    | 1.11005100  | 2.33107500  | -0.47466100 |
| 7      | 6      | C    | 2.43285600  | 1.98308500  | -0.04519900 |
| 8      | 6      | C    | 3.33491200  | 2.99515800  | 0.33074700  |
| 9      | 6      | C    | 2.95032800  | 4.33232900  | 0.29018300  |
| 10     | 1      | H    | 1.34687200  | 5.72535200  | -0.13525600 |
| 11     | 1      | H    | -0.27453200 | 3.97057500  | -0.77997900 |
| 12     | 1      | H    | 4.33481700  | 2.72594900  | 0.67926900  |
| 13     | 1      | H    | 3.65282400  | 5.11226500  | 0.59288500  |
| 14     | 6      | C    | -2.00185900 | -1.99927000 | -1.29651400 |
| 15     | 6      | C    | -1.55173400 | 0.07869700  | -1.58310200 |
| 16     | 6      | C    | -2.84780200 | -0.20704800 | -2.08448300 |
| 17     | 7      | N    | -3.11763500 | -1.51228000 | -1.88572100 |
| 18     | 1      | H    | -1.90683800 | -3.04034500 | -0.98565400 |
| 19     | 1      | H    | -3.55714500 | 0.48182800  | -2.53840100 |
| 20     | 6      | C    | 4.72148000  | -2.40483400 | 0.31659000  |
| 21     | 6      | C    | 3.73691300  | -1.45185400 | 0.14534900  |
| 22     | 6      | C    | 2.75157300  | -3.38112600 | 0.05183400  |
| 23     | 7      | N    | 4.07583600  | -3.61843200 | 0.25625400  |
| 24     | 1      | H    | 5.79266600  | -2.31678400 | 0.47671200  |
| 25     | 1      | H    | 2.00741800  | -4.17087700 | -0.03830900 |
| 26     | 6      | C    | -0.84512800 | 1.31387500  | -1.42161500 |
| 27     | 6      | C    | 3.80516800  | 0.00685100  | 0.11040800  |
| 28     | 1      | H    | 4.79956800  | 0.48557200  | 0.15499500  |
| 29     | 1      | H    | -1.30417600 | 2.23394300  | -1.81377700 |
| 30     | 7      | N    | -1.02840200 | -1.09847800 | -1.10197600 |
| 31     | 7      | N    | 2.51641400  | -2.09010500 | -0.02025300 |
| 32     | 8      | O    | 0.51500500  | -0.75464600 | 1.82497200  |
| 33     | 15     | P    | -4.17239100 | 0.07230700  | 0.87893300  |
| 34     | 8      | O    | -4.90417800 | 0.75204100  | 1.99592600  |
| 35     | 8      | O    | -3.02225300 | -0.98609500 | 1.35948600  |
| 36     | 1      | H    | 4.50845500  | -4.53089500 | 0.34887600  |
| 37     | 8      | O    | -5.11875400 | -0.90516000 | 0.02922000  |
| 38     | 8      | O    | -3.46259300 | 1.12903300  | -0.03246300 |

S 20

|    |   |   |             |             |             |
|----|---|---|-------------|-------------|-------------|
| 39 | 8 | O | -0.35929100 | 0.01151400  | 2.22299800  |
| 40 | 1 | H | -2.22953700 | -0.51182100 | 1.66016600  |
| 41 | 1 | H | -4.62115800 | -1.34894100 | -0.69648600 |

<sup>4</sup>TS5

| Center Number | Atomic Number | Atomic Type | Coordinates(Angstroms) |             |             |
|---------------|---------------|-------------|------------------------|-------------|-------------|
|               |               |             | X                      | Y           | Z           |
| 1             | 29            | Cu          | -0.43514100            | 0.14146600  | -1.11331000 |
| 2             | 7             | N           | -2.52664100            | 1.05442400  | -0.22060100 |
| 3             | 7             | N           | -1.91599200            | -1.49162400 | -0.23062600 |
| 4             | 6             | C           | -5.51069700            | -1.73164200 | 0.73070100  |
| 5             | 6             | C           | -4.21255800            | -2.14317100 | 0.43040300  |
| 6             | 6             | C           | -3.21699400            | -1.19786500 | 0.12104800  |
| 7             | 6             | C           | -3.56251500            | 0.19427400  | 0.11389200  |
| 8             | 6             | C           | -4.87777700            | 0.58604800  | 0.41476800  |
| 9             | 6             | C           | -5.84615500            | -0.36950100 | 0.72134300  |
| 10            | 1             | H           | -6.27454800            | -2.47825300 | 0.96213300  |
| 11            | 1             | H           | -3.96266800            | -3.20639000 | 0.40870200  |
| 12            | 1             | H           | -5.14280100            | 1.64574900  | 0.38305400  |
| 13            | 1             | H           | -6.86926600            | -0.05647200 | 0.94255300  |
| 14            | 6             | C           | 1.85499600             | -1.69269000 | -1.46690500 |
| 15            | 6             | C           | 0.17231900             | -2.51536800 | -0.39752100 |
| 16            | 6             | C           | 1.32881300             | -3.17262500 | 0.02422800  |
| 17            | 7             | N           | 2.38147400             | -2.64206300 | -0.65813400 |
| 18            | 1             | H           | 2.47441900             | -1.04918400 | -2.08870300 |
| 19            | 1             | H           | 1.45628400             | -3.94170900 | 0.78411700  |
| 20            | 6             | C           | -0.51112800            | 4.09953500  | 0.10022000  |
| 21            | 6             | C           | -1.06588400            | 2.87567500  | -0.22005900 |
| 22            | 6             | C           | 1.02210400             | 2.79184800  | -0.83552300 |
| 23            | 7             | N           | 0.80355100             | 4.02435900  | -0.29985800 |
| 24            | 1             | H           | -0.93020000            | 4.98193800  | 0.57640800  |
| 25            | 1             | H           | 2.00013000             | 2.41537500  | -1.13943500 |
| 26            | 6             | C           | -1.17876500            | -2.48845800 | 0.11731900  |
| 27            | 6             | C           | -2.34968000            | 2.27132700  | 0.12799700  |
| 28            | 1             | H           | -3.04900900            | 2.85138700  | 0.75660800  |
| 29            | 1             | H           | -1.49751000            | -3.26315900 | 0.83716800  |
| 30            | 7             | N           | 0.54251600             | -1.56921100 | -1.34454900 |
| 31            | 7             | N           | -0.09044400            | 2.08972100  | -0.81496700 |

|    |    |   |            |             |             |
|----|----|---|------------|-------------|-------------|
| 32 | 8  | O | 0.14662000 | 0.08410200  | 1.41949100  |
| 33 | 15 | P | 4.13572700 | -0.21160900 | 0.52024500  |
| 34 | 8  | O | 3.33645100 | 0.73008900  | -0.41089400 |
| 35 | 8  | O | 3.23111600 | -0.54439800 | 1.83689700  |
| 36 | 1  | H | 1.50630300 | 4.74623800  | -0.18438900 |
| 37 | 8  | O | 4.51512800 | -1.60760000 | -0.01336300 |
| 38 | 8  | O | 5.33064100 | 0.70748100  | 0.88523900  |
| 39 | 8  | O | 0.67212100 | 1.02584200  | 1.96349700  |
| 40 | 1  | H | 2.81344700 | 0.26087400  | 2.17497400  |
| 41 | 1  | H | 3.56428200 | -2.30246400 | -0.28812000 |

<sup>4</sup>14

| Center Number | Atomic Number | Atomic Type | Coordinates(Angstroms) |             |             |
|---------------|---------------|-------------|------------------------|-------------|-------------|
|               |               |             | X                      | Y           | Z           |
| 1             | 29            | Cu          | 0.64208900             | 0.00000000  | -0.20738600 |
| 2             | 7             | N           | -0.89506300            | 1.30068100  | -0.28297600 |
| 3             | 7             | N           | -0.89506300            | -1.30068200 | -0.28297600 |
| 4             | 6             | C           | -4.58246500            | -0.70233000 | -0.33097800 |
| 5             | 6             | C           | -3.38254900            | -1.41189500 | -0.31575600 |
| 6             | 6             | C           | -2.16811000            | -0.71194300 | -0.30210200 |
| 7             | 6             | C           | -2.16811100            | 0.71194200  | -0.30210200 |
| 8             | 6             | C           | -3.38254900            | 1.41189200  | -0.31575600 |
| 9             | 6             | C           | -4.58246500            | 0.70232700  | -0.33097800 |
| 10            | 1             | H           | -5.52991200            | -1.24530300 | -0.34189200 |
| 11            | 1             | H           | -3.39964200            | -2.50310400 | -0.31390500 |
| 12            | 1             | H           | -3.39964400            | 2.50310200  | -0.31390400 |
| 13            | 1             | H           | -5.52991200            | 1.24530000  | -0.34189100 |
| 14            | 6             | C           | 2.95560800             | -2.19867800 | -0.18296900 |
| 15            | 6             | C           | 0.86555100             | -2.80933900 | -0.25151000 |
| 16            | 6             | C           | 1.61669200             | -3.96846700 | -0.24317200 |
| 17            | 7             | N           | 2.92122700             | -3.55491400 | -0.19995300 |
| 18            | 1             | H           | 3.73650500             | -4.16586200 | -0.18406400 |
| 19            | 1             | H           | 3.87999100             | -1.62442600 | -0.14861400 |
| 20            | 1             | H           | 1.32990600             | -5.01799600 | -0.26455400 |
| 21            | 6             | C           | 1.61668900             | 3.96846800  | -0.24317200 |
| 22            | 6             | C           | 0.86554900             | 2.80934000  | -0.25151000 |
| 23            | 6             | C           | 2.95560600             | 2.19868000  | -0.18296900 |
| 24            | 7             | N           | 2.92122500             | 3.55491600  | -0.19995400 |

|    |   |   |             |             |             |
|----|---|---|-------------|-------------|-------------|
| 25 | 1 | H | 3.73650200  | 4.16586400  | -0.18406500 |
| 26 | 1 | H | 1.32990200  | 5.01799700  | -0.26455500 |
| 27 | 1 | H | 3.87999000  | 1.62442900  | -0.14861400 |
| 28 | 6 | C | -0.55469600 | -2.54785900 | -0.28929800 |
| 29 | 6 | C | -0.55469800 | 2.54785800  | -0.28929800 |
| 30 | 1 | H | -1.27592800 | 3.37387300  | -0.32108200 |
| 31 | 1 | H | -1.27592500 | -3.37387400 | -0.32108200 |

|    |   |   |             |             |             |
|----|---|---|-------------|-------------|-------------|
| 32 | 7 | N | 1.72927900  | -1.71466200 | -0.21333100 |
| 33 | 7 | N | 1.72927800  | 1.71466300  | -0.21333100 |
| 34 | 8 | O | 0.20377800  | -0.00000100 | 2.39986900  |
| 35 | 8 | O | -0.91364100 | 0.00000100  | 2.83756800  |
